# Supplementary material for: Yixin‐Shu Capsules Ameliorated Ischemia‐Induced Heart Failure by Restoring Trx2 and Inhibiting JNK/p38 Activation
Source: Hindawi journal article supplement (doi:10.1155/2021/8049079), 2021-01-01
Supplement: f1 [file 8049079.f1.zip]

# HF+VST VS HF

| Gene      | FDR      | LR       | PValue   | logCPM   | logFC    |
|-----------|----------|----------|----------|----------|----------|
| Mpv171    | 2.66E-02 | 8.98E+00 | 2.73E-03 | 0.03638  | 1.24E+00 |
| Dkc1      | 3.30E-02 | 8.50E+00 | 3.54E-03 | -2.65564 | 4.31E+00 |
| Vps8      | 0.00E+00 | 1.80E+03 | 0.00E+00 | 7.719116 | 2.17E+00 |
| LOC689396 | 4.30E-02 | 7.94E+00 | 4.84E-03 | -0.86106 | 1.36E+00 |
| Vps8      | 9.57E-06 | 2.58E+01 | 3.85E-07 | 2.058501 | 1.11E+00 |
| LOC689396 | 1.61E-03 | 1.50E+01 | 1.09E-04 | 1.45662  | 1.42E+00 |
| Neurog3   | 2.78E-02 | 8.88E+00 | 2.88E-03 | 0.134741 | 1.18E+00 |
| Vps8      | 1.17E-19 | 9.23E+01 | 7.34E-22 | 3.784618 | 1.24E+00 |
| Dkc1      | 2.25E-02 | 9.34E+00 | 2.24E-03 | -0.67448 | 1.42E+00 |
| Dkc1      | 4.24E-03 | 1.29E+01 | 3.26E-04 | -1.3939  | 6.45E+00 |
| Gnaz      | #####    | 6.31E+02 | #####    | 6.313021 | 1.08E+00 |
| LOC689396 | 2.47E-04 | 1.89E+01 | 1.37E-05 | 1.494523 | 2.35E+00 |
| Gnaz      | 4.67E-02 | 7.75E+00 | 5.37E-03 | -0.32048 | 1.80E+00 |
| Vps8      | 3.17E-02 | 8.59E+00 | 3.38E-03 | 0.358455 | 1.04E+00 |
| Gnaz      | #####    | 5.45E+02 | #####    | 5.832141 | 1.27E+00 |
| Vps8      | 3.65E-02 | 8.28E+00 | 4.00E-03 | -0.54171 | 1.22E+00 |
| Gnaz      | 1.18E-02 | 1.07E+01 | 1.06E-03 | 0.060064 | 1.28E+00 |
| Dkc1      | 1.70E-02 | 9.93E+00 | 1.63E-03 | 0.016333 | 1.22E+00 |
| Vps8      | 7.34E-03 | 1.17E+01 | 6.10E-04 | 0.062656 | 2.54E+00 |
| LOC689396 | 6.50E-05 | 2.18E+01 | 3.10E-06 | 1.612015 | 1.10E+00 |
| Gnaz      | 4.72E-03 | 1.27E+01 | 3.68E-04 | -0.82458 | 1.84E+00 |
| Vps8      | 1.61E-31 | 1.48E+02 | 3.87E-34 | 2.822703 | 2.15E+00 |
| Gnaz      | 1.34E-04 | 2.02E+01 | 6.91E-06 | 1.437771 | 1.13E+00 |
| Vps8      | 3.10E-02 | 8.64E+00 | 3.29E-03 | -1.26171 | 1.65E+00 |
| Dkc1      | 3.10E-02 | 8.64E+00 | 3.29E-03 | 0.71964  | 1.80E+00 |
| Vps8      | 4.18E-02 | 8.00E+00 | 4.68E-03 | 1.003912 | 1.04E+00 |
| LOC689396 | 4.45E-02 | 7.86E+00 | 5.06E-03 | -2.14551 | 2.51E+00 |
| Gnaz      | 4.96E-25 | 1.18E+02 | 2.01E-27 | 2.868859 | 1.68E+00 |
| Vps8      | 1.75E-03 | 1.48E+01 | 1.20E-04 | -1.65698 | 2.81E+00 |
| Pdxdc1    | 2.90E-02 | 8.79E+00 | 3.03E-03 | -0.83831 | 1.54E+00 |
| Gnaz      | 2.61E-04 | 1.88E+01 | 1.45E-05 | 0.694362 | 1.29E+00 |
| Gnaz      | 7.56E-03 | 1.17E+01 | 6.31E-04 | -0.86647 | 2.93E+00 |
| Dkc1      | 4.95E-02 | 7.62E+00 | 5.78E-03 | -2.37844 | 2.94E+00 |
| Vps8      | 1.23E-05 | 2.52E+01 | 5.10E-07 | 1.044049 | 1.39E+00 |
| Neurog3   | 4.69E-02 | 7.74E+00 | 5.40E-03 | -2.73374 | 4.10E+00 |
| Vps8      | 1.22E-05 | 2.52E+01 | 5.05E-07 | 2.125236 | 1.06E+00 |
| Gnaz      | 9.47E-05 | 2.09E+01 | 4.72E-06 | -1.095   | 2.61E+00 |
| Vps8      | 2.97E-02 | 8.73E+00 | 3.12E-03 | 3.157256 | 1.93E+00 |
| Gnaz      | 8.21E-05 | 2.12E+01 | 4.04E-06 | 1.027727 | 1.30E+00 |
| Vps8      | 2.06E-51 | 2.42E+02 | 1.65E-54 | 3.238617 | 2.33E+00 |
| Vps8      | 1.98E-02 | 9.61E+00 | 1.93E-03 | 0.287607 | 1.13E+00 |
| Vps8      | 2.27E-02 | 9.32E+00 | 2.27E-03 | -0.14628 | 1.27E+00 |
| Gnaz      | 1.05E-02 | 1.10E+01 | 9.28E-04 | 0.75457  | 1.37E+00 |
| Gnaz      | 4.52E-02 | 7.82E+00 | 5.17E-03 | 1.739226 | 1.18E+00 |
| LOC689396 | 7.93E-22 | 1.03E+02 | 4.11E-24 | 4.022365 | 1.09E+00 |
| Vps8      | 1.62E-03 | 1.50E+01 | 1.10E-04 | 0.883924 | 1.18E+00 |
| Vps8      | 2.43E-02 | 9.17E+00 | 2.46E-03 | -2.31977 | 3.06E+00 |
| LOC689396 | 2.38E-02 | 9.22E+00 | 2.40E-03 | 0.678271 | 1.03E+00 |
| Dkc1      | 3.30E-02 | 8.51E+00 | 3.54E-03 | 1.442525 | 1.53E+00 |
| Dkc1      | 3.41E-02 | 8.43E+00 | 3.69E-03 | -1.15457 | 1.63E+00 |
| LOC689396 | 1.58E-02 | 1.01E+01 | 1.49E-03 | -1.51538 | 2.23E+00 |

|           |          |          |          |          |          |
|-----------|----------|----------|----------|----------|----------|
| Neurog3   | 2.34E-02 | 9.25E+00 | 2.35E-03 | -0.28626 | 1.22E+00 |
| Mpv171    | 3.05E-19 | 9.03E+01 | 2.02E-21 | 4.108809 | 1.04E+00 |
| LOC689396 | 2.83E-03 | 1.38E+01 | 2.06E-04 | 0.530186 | 1.83E+00 |
| Vps8      | 3.23E-02 | 8.55E+00 | 3.46E-03 | 3.261363 | 1.38E+00 |
| Mpv171    | 7.74E-03 | 1.16E+01 | 6.50E-04 | 1.606864 | 1.59E+00 |
| Vps8      | 1.25E-02 | 1.06E+01 | 1.14E-03 | 0.803094 | 1.02E+00 |
| Dkc1      | 2.83E-02 | 8.84E+00 | 2.95E-03 | -1.01901 | 1.52E+00 |
| Vps8      | 1.24E-03 | 1.55E+01 | 8.19E-05 | 1.55043  | 1.09E+00 |
| Gnaz      | 4.00E-02 | 8.09E+00 | 4.46E-03 | -1.51227 | 1.68E+00 |
| Neurog3   | 5.43E-03 | 1.24E+01 | 4.32E-04 | 0.388003 | 2.38E+00 |
| LOC689396 | 4.00E-03 | 1.30E+01 | 3.05E-04 | 1.368108 | 1.23E+00 |
| Vps8      | 3.10E-03 | 1.36E+01 | 2.28E-04 | -1.21651 | 2.76E+00 |
| Gnaz      | 1.01E-23 | 1.12E+02 | 4.57E-26 | 3.456373 | 1.37E+00 |
| Dkc1      | 1.01E-02 | 1.11E+01 | 8.83E-04 | 0.042895 | 1.25E+00 |
| Mpv171    | 1.87E-02 | 9.72E+00 | 1.82E-03 | 0.406901 | 1.11E+00 |
| LOC689396 | 4.67E-03 | 1.27E+01 | 3.64E-04 | 0.567607 | 1.17E+00 |
| Gnaz      | 4.43E-02 | 7.87E+00 | 5.03E-03 | -2.73555 | 4.09E+00 |
| Vps8      | 4.17E-02 | 8.01E+00 | 4.66E-03 | -1.94594 | 2.30E+00 |
| Neurog3   | 6.25E-03 | 1.21E+01 | 5.07E-04 | 0.109487 | 1.41E+00 |
| Neurog3   | 2.60E-03 | 1.39E+01 | 1.88E-04 | -2.15494 | 5.33E+00 |
| LOC689396 | 9.75E-12 | 5.45E+01 | 1.57E-13 | 0.044249 | 3.65E+00 |
| Dkc1      | 1.90E-84 | 3.96E+02 | 4.11E-88 | 6.926796 | 1.05E+00 |
| Gnaz      | 2.48E-02 | 9.12E+00 | 2.52E-03 | -2.65827 | 4.30E+00 |
| 493140000 | 6.03E-04 | 1.71E+01 | 3.63E-05 | 0.538743 | 3.21E+00 |
| Gnaz      | 7.84E-03 | 1.16E+01 | 6.59E-04 | -2.04082 | 3.62E+00 |
| Gnaz      | 2.14E-02 | 9.45E+00 | 2.11E-03 | -0.04778 | 1.11E+00 |
| Vps8      | 1.56E-02 | 1.01E+01 | 1.47E-03 | -2.58499 | 4.48E+00 |
| Neurog3   | 9.57E-03 | 1.12E+01 | 8.32E-04 | 2.997184 | 1.29E+00 |
| Reep3     | 2.28E-02 | 9.31E+00 | 2.28E-03 | -0.75672 | 1.54E+00 |
| Gnaz      | 2.49E-05 | 2.38E+01 | 1.09E-06 | 0.788109 | 4.03E+00 |
| Mpv171    | 1.53E-28 | 1.34E+02 | 4.51E-31 | 4.602388 | 1.13E+00 |
| LOC689396 | 4.36E-02 | 7.90E+00 | 4.93E-03 | -2.73583 | 4.09E+00 |
| Gnaz      | 3.58E-02 | 8.32E+00 | 3.92E-03 | -0.55792 | 1.39E+00 |
| Dkc1      | 7.19E-06 | 2.64E+01 | 2.82E-07 | 1.30255  | 1.38E+00 |
| Vps8      | 2.36E-05 | 2.39E+01 | 1.03E-06 | 4.249449 | 1.02E+00 |
| Vps8      | 2.72E-02 | 8.93E+00 | 2.81E-03 | -0.69385 | 1.40E+00 |
| Vps8      | 1.65E-05 | 2.46E+01 | 6.98E-07 | 0.380023 | 1.79E+00 |
| Vps8      | 7.53E-03 | 1.17E+01 | 6.27E-04 | -1.94416 | 2.89E+00 |
| Vps8      | 1.17E-10 | 4.93E+01 | 2.24E-12 | 1.805854 | 1.61E+00 |
| Reep3     | 4.34E-02 | 7.91E+00 | 4.90E-03 | -2.14705 | 2.52E+00 |
| Gnaz      | 2.47E-04 | 1.89E+01 | 1.37E-05 | 1.403355 | 1.11E+00 |
| Gnaz      | 1.60E-06 | 2.95E+01 | 5.50E-08 | 2.861257 | 2.26E+00 |
| LOC689396 | 1.96E-13 | 6.27E+01 | 2.41E-15 | 3.576489 | 1.78E+00 |
| Reep3     | 3.15E-02 | 8.61E+00 | 3.35E-03 | -2.31574 | 3.08E+00 |
| Gnaz      | 2.75E-02 | 8.90E+00 | 2.85E-03 | 1.246648 | 2.30E+00 |
| LOC689396 | 5.49E-04 | 1.73E+01 | 3.27E-05 | -0.07096 | 2.64E+00 |
| Vps8      | 1.82E-03 | 1.47E+01 | 1.26E-04 | 0.990936 | 1.10E+00 |
| Gnaz      | 3.54E-02 | 8.35E+00 | 3.87E-03 | 0.038485 | 1.40E+00 |
| Neurog3   | 3.35E-02 | 8.48E+00 | 3.60E-03 | -0.86149 | 1.37E+00 |
| Mpv171    | 2.46E-03 | 1.41E+01 | 1.77E-04 | 2.761616 | 2.14E+00 |
| Gnaz      | 6.44E-28 | 1.31E+02 | 2.01E-30 | 3.468487 | 1.45E+00 |
| Gnaz      | 4.56E-03 | 1.28E+01 | 3.54E-04 | -1.89931 | 2.97E+00 |
| Gnaz      | 9.95E-08 | 3.53E+01 | 2.84E-09 | 2.929569 | 3.72E+00 |
| Vps8      | 2.06E-02 | 9.52E+00 | 2.03E-03 | -2.6562  | 4.30E+00 |

|           |          |          |          |          |          |
|-----------|----------|----------|----------|----------|----------|
| Gnaz      | 2.55E-02 | 9.06E+00 | 2.61E-03 | -0.87766 | 1.47E+00 |
| Dkc1      | 4.14E-03 | 1.30E+01 | 3.17E-04 | -2.10637 | 5.39E+00 |
| LOC689396 | 7.54E-04 | 1.66E+01 | 4.68E-05 | -0.00634 | 1.49E+00 |
| Vps8      | 8.20E-72 | 3.37E+02 | 2.53E-75 | 3.744595 | 2.52E+00 |
| Gnaz      | 1.08E-05 | 2.55E+01 | 4.44E-07 | 1.355599 | 1.30E+00 |
| Vps8      | 1.25E-03 | 1.55E+01 | 8.31E-05 | 7.506601 | 1.03E+00 |
| Dkc1      | 2.28E-02 | 9.31E+00 | 2.28E-03 | 1.489702 | 1.90E+00 |
| Vps8      | 1.14E-02 | 1.08E+01 | 1.02E-03 | -1.69856 | 2.30E+00 |
| Gnaz      | 6.65E-04 | 1.68E+01 | 4.06E-05 | 2.273048 | 2.06E+00 |
| Mpv171    | 4.06E-02 | 8.06E+00 | 4.53E-03 | -0.86044 | 1.36E+00 |
| LOC689396 | 1.94E-02 | 9.65E+00 | 1.89E-03 | -2.58004 | 4.50E+00 |
| Gnaz      | 6.44E-03 | 1.20E+01 | 5.24E-04 | -1.852   | 3.04E+00 |
| Vps8      | 1.25E-17 | 8.26E+01 | 9.80E-20 | 3.968951 | 1.02E+00 |
| Vps8      | 1.70E-02 | 9.93E+00 | 1.62E-03 | 4.739325 | 1.32E+00 |
| Vps8      | 7.34E-71 | 3.32E+02 | 2.94E-74 | 5.63143  | 1.10E+00 |
| Gnaz      | 2.90E-02 | 8.79E+00 | 3.04E-03 | -2.0958  | 2.62E+00 |
| Dkc1      | 4.36E-02 | 7.90E+00 | 4.94E-03 | -2.73583 | 4.09E+00 |
| Vps8      | 2.38E-02 | 9.21E+00 | 2.40E-03 | 0.164108 | 1.10E+00 |
| Gnaz      | 1.13E-02 | 1.08E+01 | 1.00E-03 | 0.210753 | 3.09E+00 |
| LOC689396 | 1.51E-02 | 1.02E+01 | 1.41E-03 | -1.17029 | 3.45E+00 |
| Vps8      | 1.82E-02 | 9.78E+00 | 1.76E-03 | -0.40707 | #####    |
| Vps8      | 1.16E-02 | 1.08E+01 | 1.04E-03 | -1.6552  | #####    |
| LOC689396 | 9.15E-04 | 1.62E+01 | 5.83E-05 | -1.47129 | #####    |
| LOC689396 | 3.54E-02 | 8.34E+00 | 3.87E-03 | 1.958956 | #####    |
| Vps8      | 1.12E-03 | 1.57E+01 | 7.32E-05 | 2.96861  | #####    |
| Gnaz      | 1.42E-02 | 1.03E+01 | 1.31E-03 | -2.32708 | #####    |
| Vps8      | 4.43E-02 | 7.87E+00 | 5.03E-03 | -1.53757 | #####    |
| Vps8      | 1.59E-02 | 1.01E+01 | 1.50E-03 | -1.69115 | #####    |
| LOC689396 | 4.67E-02 | 7.75E+00 | 5.37E-03 | -2.73568 | #####    |
| Vps8      | 3.32E-02 | 8.49E+00 | 3.56E-03 | -2.65798 | #####    |
| Vps8      | 2.17E-02 | 9.41E+00 | 2.15E-03 | 0.106671 | #####    |
| Gnaz      | 1.81E-03 | 1.47E+01 | 1.25E-04 | -0.79656 | #####    |
| LOC689396 | 3.23E-02 | 8.55E+00 | 3.45E-03 | 2.442645 | #####    |
| Neurog3   | 4.95E-02 | 7.62E+00 | 5.78E-03 | -1.28446 | #####    |
| LOC689396 | 1.36E-02 | 1.04E+01 | 1.26E-03 | -2.10328 | #####    |
| Gnaz      | 1.08E-02 | 1.09E+01 | 9.57E-04 | -0.0341  | #####    |
| Vps8      | 8.91E-04 | 1.62E+01 | 5.65E-05 | -0.14525 | #####    |
| LOC689396 | 4.17E-02 | 8.00E+00 | 4.67E-03 | -2.58748 | #####    |
| Neurog3   | 2.37E-13 | 6.23E+01 | 2.94E-15 | 3.471283 | #####    |
| Vps8      | 3.05E-11 | 5.21E+01 | 5.35E-13 | -0.27906 | #####    |
| Vps8      | 8.51E-07 | 3.09E+01 | 2.78E-08 | 0.271918 | #####    |
| Vps8      | 1.21E-05 | 2.53E+01 | 5.01E-07 | 2.023934 | #####    |
| LOC689396 | 2.35E-03 | 1.42E+01 | 1.68E-04 | 1.706794 | #####    |
| Mpv171    | 4.74E-03 | 1.27E+01 | 3.71E-04 | 0.501974 | #####    |
| Reep3     | 2.85E-04 | 1.86E+01 | 1.59E-05 | -1.85678 | #####    |
| Vps8      | #####    | 1.40E+03 | #####    | 5.886512 | #####    |
| Gnaz      | 3.32E-02 | 8.50E+00 | 3.56E-03 | 1.057121 | #####    |
| LOC689396 | 6.15E-03 | 1.21E+01 | 4.97E-04 | -2.38458 | #####    |
| Vps8      | 3.27E-12 | 5.68E+01 | 4.84E-14 | 2.38596  | #####    |
| LOC689396 | 2.94E-02 | 8.76E+00 | 3.08E-03 | -2.32282 | #####    |
| LOC689396 | 2.25E-02 | 9.34E+00 | 2.25E-03 | 0.281198 | #####    |
| Gnaz      | 4.51E-04 | 1.77E+01 | 2.63E-05 | 1.425038 | #####    |
| Vps8      | 4.61E-03 | 1.27E+01 | 3.59E-04 | 0.690798 | #####    |
| LOC689396 | 3.63E-05 | 2.30E+01 | 1.64E-06 | -0.89462 | #####    |

|           |          |          |          |          |       |
|-----------|----------|----------|----------|----------|-------|
| Neurog3   | 9.36E-03 | 1.12E+01 | 8.10E-04 | -1.3896  | ##### |
| LOC689396 | 1.90E-03 | 1.46E+01 | 1.32E-04 | -2.26174 | ##### |
| Vps8      | 2.11E-02 | 9.48E+00 | 2.08E-03 | 6.928976 | ##### |
| LOC689396 | 5.43E-03 | 1.24E+01 | 4.32E-04 | 3.336857 | ##### |
| Vps8      | 1.05E-02 | 1.10E+01 | 9.28E-04 | -1.11817 | ##### |
| LOC689396 | 5.23E-03 | 1.25E+01 | 4.14E-04 | -1.7764  | ##### |
| LOC689396 | 7.65E-04 | 1.65E+01 | 4.77E-05 | 0.802215 | ##### |
| LOC689396 | 3.92E-02 | 8.13E+00 | 4.35E-03 | -2.38158 | ##### |
| Gnaz      | 1.32E-02 | 1.05E+01 | 1.22E-03 | 2.05721  | ##### |
| Vps8      | 2.95E-04 | 1.85E+01 | 1.66E-05 | 1.228282 | ##### |
| LOC689396 | 1.99E-04 | 1.94E+01 | 1.07E-05 | 0.466734 | ##### |
| LOC689396 | 3.01E-06 | 2.82E+01 | 1.10E-07 | -1.18288 | ##### |
| Mpv17l    | 1.70E-02 | 9.93E+00 | 1.62E-03 | -2.58535 | ##### |
| Vps8      | 4.54E-04 | 1.77E+01 | 2.65E-05 | 0.758206 | ##### |
| Pdxdc1    | 2.88E-05 | 2.35E+01 | 1.27E-06 | 2.315851 | ##### |
| Dkc1      | 1.71E-02 | 9.91E+00 | 1.64E-03 | -2.57948 | ##### |
| Dkc1      | 2.28E-03 | 1.42E+01 | 1.62E-04 | -2.31982 | ##### |
| Gnaz      | 1.08E-02 | 1.09E+01 | 9.60E-04 | 0.632492 | ##### |
| Vps8      | 4.90E-02 | 7.65E+00 | 5.69E-03 | -2.7346  | ##### |
| LOC689396 | 6.57E-03 | 1.20E+01 | 5.38E-04 | 0.784851 | ##### |
| Dkc1      | 1.70E-27 | 1.29E+02 | 5.50E-30 | 5.26263  | ##### |
| Gnaz      | 8.19E-03 | 1.15E+01 | 6.93E-04 | -1.57703 | ##### |
| LOC689396 | 2.77E-02 | 8.89E+00 | 2.87E-03 | -2.07726 | ##### |
| Vps8      | 4.45E-02 | 7.85E+00 | 5.07E-03 | -1.94662 | ##### |
| Reep3     | 1.16E-03 | 1.56E+01 | 7.64E-05 | 0.040095 | ##### |
| LOC689396 | 2.92E-03 | 1.37E+01 | 2.13E-04 | 1.011426 | ##### |
| Vps8      | 5.34E-04 | 1.73E+01 | 3.17E-05 | -2.2034  | ##### |
| Vps8      | 4.44E-02 | 7.86E+00 | 5.05E-03 | -1.3273  | ##### |
| Gnaz      | 9.36E-08 | 3.54E+01 | 2.67E-09 | -0.23837 | ##### |
| Vps8      | 1.88E-02 | 9.72E+00 | 1.82E-03 | 0.470782 | ##### |
| LOC689396 | 8.28E-03 | 1.15E+01 | 7.01E-04 | -2.10203 | ##### |
| Gnaz      | 3.22E-02 | 8.56E+00 | 3.44E-03 | -0.33022 | ##### |
| Vps8      | 1.08E-08 | 3.99E+01 | 2.70E-10 | 2.014265 | ##### |
| LOC689396 | 1.93E-02 | 9.67E+00 | 1.88E-03 | 2.146526 | ##### |
| Dkc1      | 7.56E-03 | 1.17E+01 | 6.31E-04 | -1.91064 | ##### |
| LOC689396 | 1.33E-02 | 1.05E+01 | 1.22E-03 | 0.018569 | ##### |
| Vps8      | 4.90E-02 | 7.65E+00 | 5.69E-03 | -2.7346  | ##### |
| Vps8      | 4.00E-02 | 8.09E+00 | 4.45E-03 | -2.32334 | ##### |
| LOC689396 | 4.51E-02 | 7.83E+00 | 5.14E-03 | -2.04351 | ##### |
| Gnaz      | 3.46E-02 | 8.40E+00 | 3.76E-03 | 0.751594 | ##### |
