# Supplementary material for: Yixin‐Shu Capsules Ameliorated Ischemia‐Induced Heart Failure by Restoring Trx2 and Inhibiting JNK/p38 Activation
Source: Hindawi journal article supplement (doi:10.1155/2021/8049079), 2021-01-01
Supplement: f1 [file 8049079.f1.zip]

# HF VS Normal

| Gene      | FDR      | LR       | PValue   | logCPM   | logFC    |
|-----------|----------|----------|----------|----------|----------|
| Cntn2     | 6.09E-06 | 2.70E+01 | 2.03E-07 | 1.913046 | 1.30E+00 |
| Ankrd2    | 1.95E-05 | 2.46E+01 | 7.05E-07 | 0.248852 | 1.83E+00 |
| Itga10    | 1.64E-07 | 3.45E+01 | 4.21E-09 | 0.229267 | 2.28E+00 |
| LOC100912 | 1.87E-02 | 9.98E+00 | 1.58E-03 | -1.58949 | 2.20E+00 |
| Crym      | 2.66E-43 | 2.02E+02 | 7.80E-46 | 5.287436 | 1.06E+00 |
| Rab15     | 4.37E-02 | 8.12E+00 | 4.37E-03 | -1.09953 | 1.85E+00 |
| Ptgs2     | 6.23E-15 | 6.96E+01 | 7.26E-17 | 1.822978 | 2.15E+00 |
| Prg4      | 4.17E-06 | 2.78E+01 | 1.36E-07 | 2.374763 | 1.07E+00 |
| LOC680663 | 2.42E-02 | 9.42E+00 | 2.15E-03 | -2.4407  | 4.59E+00 |
| RGD156166 | 9.04E-04 | 1.65E+01 | 4.84E-05 | -0.29769 | 1.74E+00 |
| Slamf9    | 4.55E-04 | 1.80E+01 | 2.24E-05 | 1.456927 | 1.11E+00 |
| Gpr183    | 1.26E-03 | 1.58E+01 | 6.99E-05 | 1.161678 | 1.08E+00 |
| Islr2     | 7.31E-11 | 5.05E+01 | 1.22E-12 | 0.531237 | 2.67E+00 |
| Nmnat2    | 4.78E-03 | 1.30E+01 | 3.19E-04 | -0.14546 | 1.50E+00 |
| Necab3    | 1.74E-03 | 1.51E+01 | 1.01E-04 | 1.383293 | 1.00E+00 |
| B4galnt3  | 2.50E-07 | 3.36E+01 | 6.63E-09 | -0.5988  | 3.64E+00 |
| Postn     | #####    | 5.51E+02 | #####    | 4.86533  | 2.10E+00 |
| Svepl     | 2.79E-10 | 4.77E+01 | 4.97E-12 | 2.916498 | 1.08E+00 |
| Gfap      | 2.59E-04 | 1.92E+01 | 1.18E-05 | -0.11879 | 1.80E+00 |
| H3f3c     | 6.49E-14 | 6.48E+01 | 8.19E-16 | 3.723686 | 1.01E+00 |
| AABR07035 | 1.13E-03 | 1.61E+01 | 6.15E-05 | -1.42667 | 3.46E+00 |
| Nod2      | 3.30E-02 | 8.74E+00 | 3.11E-03 | -0.1499  | 1.40E+00 |
| Cpz       | 2.12E-04 | 1.96E+01 | 9.46E-06 | 1.442207 | 1.31E+00 |
| Hapln1    | 4.78E-03 | 1.30E+01 | 3.19E-04 | 0.646863 | 1.11E+00 |
| Cd33      | 5.61E-03 | 1.26E+01 | 3.86E-04 | 0.973578 | 1.04E+00 |
| Csrp2     | 1.53E-22 | 1.05E+02 | 1.03E-24 | 3.650553 | 1.27E+00 |
| Cilp      | 5.69E-68 | 3.16E+02 | 1.00E-70 | 4.371508 | 2.15E+00 |
| Kcnt1     | 4.05E-02 | 8.29E+00 | 3.99E-03 | 0.110081 | 1.03E+00 |
| Cp        | 1.69E-41 | 1.94E+02 | 5.21E-44 | 4.692023 | 1.33E+00 |
| Misl8a    | 3.67E-06 | 2.80E+01 | 1.19E-07 | -0.04654 | 2.71E+00 |
| Cacnalg   | 2.94E-40 | 1.88E+02 | 9.26E-43 | 4.463507 | 1.43E+00 |
| Olfm2     | 2.56E-02 | 9.30E+00 | 2.29E-03 | 0.248813 | 1.15E+00 |
| Adamts8   | 8.05E-10 | 4.55E+01 | 1.52E-11 | 1.141437 | 2.14E+00 |
| Cdk12     | 9.70E-05 | 2.12E+01 | 4.04E-06 | 1.88144  | 1.09E+00 |
| NEWGENE_1 | 3.04E-02 | 8.92E+00 | 2.83E-03 | 1.253773 | 1.91E+00 |
| Plekha4   | 9.80E-17 | 7.81E+01 | 9.77E-19 | 4.289194 | 1.10E+00 |
| Tmem45b   | 4.30E-04 | 1.81E+01 | 2.09E-05 | -1.67502 | 3.94E+00 |
| Gdf6      | 3.37E-06 | 2.82E+01 | 1.08E-07 | 0.164192 | 2.18E+00 |
| Cdhr1     | 1.75E-09 | 4.39E+01 | 3.44E-11 | 1.412175 | 1.78E+00 |
| Mybpc2    | 3.99E-17 | 8.00E+01 | 3.80E-19 | 2.25724  | 1.89E+00 |
| Tnfsf18   | 3.01E-03 | 1.40E+01 | 1.87E-04 | -0.34547 | 1.78E+00 |
| Kctd15    | 1.07E-07 | 3.54E+01 | 2.65E-09 | 2.414659 | 1.14E+00 |
| Tmem119   | 2.55E-19 | 9.03E+01 | 2.06E-21 | 1.031421 | 3.27E+00 |
| Pcdhb21   | 4.61E-02 | 8.00E+00 | 4.68E-03 | 0.198017 | 1.00E+00 |
| Trappc2b  | 4.07E-02 | 8.28E+00 | 4.01E-03 | 0.552562 | 2.02E+00 |
| Testin    | 4.76E-05 | 2.27E+01 | 1.85E-06 | -0.61837 | 2.57E+00 |
| Fxyd7     | 4.32E-04 | 1.81E+01 | 2.11E-05 | 1.482888 | 1.06E+00 |
| Egr2      | 3.03E-13 | 6.17E+01 | 4.07E-15 | 2.52569  | 1.59E+00 |
| Ccl20     | 6.86E-03 | 1.22E+01 | 4.87E-04 | -0.74968 | 2.01E+00 |
| Slc44a3   | 2.24E-02 | 9.59E+00 | 1.96E-03 | -0.53629 | 1.50E+00 |
| Tceal7    | 6.24E-73 | 3.39E+02 | 9.83E-76 | 4.12297  | 2.21E+00 |

|           |          |          |          |          |          |
|-----------|----------|----------|----------|----------|----------|
| LOC100910 | 4.92E-02 | 7.85E+00 | 5.07E-03 | 1.484368 | 1.29E+00 |
| Lrrc15    | 1.66E-02 | 1.02E+01 | 1.37E-03 | -2.26016 | 4.92E+00 |
| Glyat11   | 6.81E-03 | 1.22E+01 | 4.82E-04 | -1.03941 | 1.95E+00 |
| Mfap5     | 4.43E-58 | 2.70E+02 | 9.70E-61 | 5.184714 | 1.65E+00 |
| Klkb1     | 6.14E-05 | 2.22E+01 | 2.44E-06 | -0.03291 | 1.93E+00 |
| Adra2a    | 2.08E-03 | 1.48E+01 | 1.23E-04 | -0.61688 | 1.90E+00 |
| AABR07057 | 3.01E-02 | 8.94E+00 | 2.79E-03 | -1.26999 | 2.69E+00 |
| Cdkn2b    | 1.07E-05 | 2.58E+01 | 3.72E-07 | -0.3826  | 2.52E+00 |
| RGD156272 | 1.38E-02 | 1.06E+01 | 1.10E-03 | -0.61319 | 1.64E+00 |
| Sfrp2     | #####    | 6.85E+02 | #####    | 4.496921 | 3.26E+00 |
| Mxra8     | 7.13E-67 | 3.11E+02 | 1.30E-69 | 6.019204 | 1.11E+00 |
| Tnfaip813 | 5.39E-03 | 1.27E+01 | 3.69E-04 | 0.940736 | 1.02E+00 |
| Runx2     | 2.70E-03 | 1.42E+01 | 1.65E-04 | 0.778823 | 1.20E+00 |
| Mybph1    | 1.15E-10 | 4.95E+01 | 1.95E-12 | -0.23925 | 3.77E+00 |
| Bmp8a     | 1.52E-03 | 1.54E+01 | 8.61E-05 | -2.13823 | 5.19E+00 |
| Pqlc3     | 3.01E-10 | 4.75E+01 | 5.39E-12 | 3.168731 | 1.17E+00 |
| Olfml2b   | 8.99E-16 | 7.36E+01 | 9.73E-18 | 3.617023 | 1.08E+00 |
| Pnma2     | 3.77E-02 | 8.45E+00 | 3.66E-03 | -0.41488 | 1.36E+00 |
| RGD156613 | 2.65E-02 | 9.23E+00 | 2.39E-03 | -1.98013 | 2.55E+00 |
| Ctsk      | 1.78E-59 | 2.77E+02 | 3.78E-62 | 4.721871 | 1.53E+00 |
| Egr3      | 2.44E-09 | 4.32E+01 | 4.90E-11 | 2.363404 | 1.29E+00 |
| Coll17a1  | 6.21E-10 | 4.60E+01 | 1.15E-11 | 1.705884 | 1.75E+00 |
| AABR07034 | 2.96E-06 | 2.85E+01 | 9.38E-08 | -0.90587 | 4.17E+00 |
| Ncam1     | 1.04E-98 | 4.59E+02 | #####    | 5.117889 | 1.68E+00 |
| Prrt2     | 4.46E-03 | 1.31E+01 | 2.95E-04 | 1.025319 | 1.05E+00 |
| Chad      | 1.94E-24 | 1.14E+02 | 1.13E-26 | 2.559435 | 2.08E+00 |
| Abl1      | 4.29E-03 | 1.32E+01 | 2.83E-04 | 2.814852 | 1.10E+00 |
| Dmpl      | 3.11E-08 | 3.80E+01 | 7.19E-10 | 1.536953 | 1.69E+00 |
| Clqtnf5   | 3.05E-63 | 2.94E+02 | 5.94E-66 | 4.062056 | 2.10E+00 |
| Vgll2     | 3.73E-05 | 2.33E+01 | 1.42E-06 | -1.84158 | 5.69E+00 |
| Kcne1     | 8.71E-16 | 7.36E+01 | 9.41E-18 | 0.485132 | 3.62E+00 |
| LOC103690 | 1.33E-02 | 1.07E+01 | 1.06E-03 | -0.53314 | 2.30E+00 |
| Mustn1    | 1.94E-13 | 6.26E+01 | 2.55E-15 | 3.574119 | 1.01E+00 |
| Capn6     | 3.75E-03 | 1.35E+01 | 2.41E-04 | 0.105981 | 1.48E+00 |
| LOC103693 | 2.96E-02 | 8.98E+00 | 2.74E-03 | 0.017483 | 2.52E+00 |
| Ptgfr     | 3.15E-92 | 4.29E+02 | 3.30E-95 | 6.681162 | 1.14E+00 |
| Piezo2    | 3.72E-06 | 2.80E+01 | 1.21E-07 | 1.462306 | 1.56E+00 |
| LOC688459 | 4.61E-02 | 8.00E+00 | 4.67E-03 | -2.59062 | 4.21E+00 |
| Hamp      | 3.10E-22 | 1.04E+02 | 2.14E-24 | 3.551544 | 1.41E+00 |
| Mup5      | 3.39E-02 | 8.68E+00 | 3.21E-03 | -0.86577 | 1.52E+00 |
| Dusp15    | 1.17E-10 | 4.95E+01 | 1.99E-12 | 3.021942 | 1.12E+00 |
| Aldh1a3   | 6.00E-12 | 5.56E+01 | 8.96E-14 | 3.004609 | 1.14E+00 |
| Fam111a   | #####    | 5.25E+02 | #####    | 6.011028 | 1.45E+00 |
| Mrgpre    | 1.87E-02 | 9.99E+00 | 1.57E-03 | -1.84169 | 2.80E+00 |
| Cercam    | 2.87E-12 | 5.71E+01 | 4.16E-14 | 3.339396 | 1.01E+00 |
| Thbs4     | #####    | 8.70E+02 | #####    | 4.475331 | 3.93E+00 |
| Fzd2      | 4.03E-17 | 7.99E+01 | 3.85E-19 | 3.298657 | 1.25E+00 |
| Prrx2     | 2.19E-14 | 6.70E+01 | 2.69E-16 | 1.177821 | 2.82E+00 |
| LOC102550 | 5.15E-23 | 1.08E+02 | 3.37E-25 | 4.910582 | 1.35E+00 |
| Cgref1    | 2.86E-16 | 7.59E+01 | 2.97E-18 | 1.036145 | 2.97E+00 |
| Mmp16     | 6.19E-04 | 1.73E+01 | 3.17E-05 | -0.71776 | 2.06E+00 |
| Pil6      | 0.00E+00 | 1.76E+03 | 0.00E+00 | 6.924527 | 2.43E+00 |
| Slc25a27  | 1.95E-02 | 9.89E+00 | 1.66E-03 | 0.737275 | 1.09E+00 |
| Syt15     | 4.83E-02 | 7.89E+00 | 4.96E-03 | -0.50083 | 1.22E+00 |

|           |          |          |          |          |          |
|-----------|----------|----------|----------|----------|----------|
| Mfsd7     | 1.36E-02 | 1.07E+01 | 1.08E-03 | 0.78787  | 1.09E+00 |
| Vtcn1     | 3.22E-02 | 8.79E+00 | 3.03E-03 | -0.98767 | 1.66E+00 |
| Tnc       | 4.09E-26 | 1.22E+02 | 2.24E-28 | 2.598352 | 2.17E+00 |
| Ighv8-4   | 7.63E-04 | 1.69E+01 | 4.00E-05 | -1.79448 | 3.75E+00 |
| Actg2     | 4.00E-36 | 1.69E+02 | 1.38E-38 | 3.421713 | 1.74E+00 |
| AC103179. | 4.81E-04 | 1.79E+01 | 2.39E-05 | 0.604593 | 1.36E+00 |
| Aspa      | 3.97E-02 | 8.33E+00 | 3.89E-03 | 0.271564 | 1.11E+00 |
| Wasf1     | 2.26E-02 | 9.58E+00 | 1.97E-03 | -2.03358 | 3.35E+00 |
| Grin3a    | 9.97E-04 | 1.63E+01 | 5.38E-05 | -2.02658 | 5.40E+00 |
| Grem1     | 2.31E-08 | 3.86E+01 | 5.26E-10 | -0.49319 | 3.46E+00 |
| Pla2g2a   | 4.94E-72 | 3.35E+02 | 8.08E-75 | 5.89477  | 1.25E+00 |
| Sphk1     | 1.28E-05 | 2.55E+01 | 4.51E-07 | 1.978259 | 1.20E+00 |
| Ighm      | 5.71E-29 | 1.35E+02 | 2.77E-31 | 3.705479 | 1.45E+00 |
| Kifla     | 4.91E-03 | 1.29E+01 | 3.30E-04 | -0.51239 | 1.77E+00 |
| Ighv1-47  | 3.59E-05 | 2.33E+01 | 1.36E-06 | -1.8436  | 5.68E+00 |
| Surf2     | 8.85E-03 | 1.16E+01 | 6.55E-04 | 2.395601 | 1.99E+00 |
| Brms1l    | 2.78E-03 | 1.41E+01 | 1.71E-04 | 1.656172 | 1.03E+00 |
| Trh       | 1.04E-34 | 1.62E+02 | 3.91E-37 | 1.879195 | 3.93E+00 |
| Fam167a   | 3.92E-04 | 1.83E+01 | 1.89E-05 | 1.872941 | 1.01E+00 |
| Nrip3     | 2.98E-03 | 1.40E+01 | 1.85E-04 | 0.41327  | 1.38E+00 |
| Ltbp2     | 0.00E+00 | 3.13E+03 | 0.00E+00 | 6.169502 | 4.33E+00 |
| Serpinf1  | #####    | 8.34E+02 | #####    | 6.398549 | 1.72E+00 |
| LOC100911 | 6.32E-03 | 1.23E+01 | 4.41E-04 | -2.31759 | 4.84E+00 |
| Adamts12  | 3.23E-42 | 1.97E+02 | 9.86E-45 | 4.190442 | 1.54E+00 |
| Coll1a1   | 1.10E-73 | 3.43E+02 | 1.70E-76 | 2.529939 | 4.92E+00 |
| Ttc29     | 5.73E-04 | 1.75E+01 | 2.91E-05 | -1.11315 | 2.61E+00 |
| Crispld1  | 3.59E-05 | 2.33E+01 | 1.36E-06 | 0.316487 | 2.12E+00 |
| Scrg1     | 3.95E-02 | 8.35E+00 | 3.86E-03 | -2.37115 | 4.78E+00 |
| AABR07011 | 3.88E-10 | 4.70E+01 | 7.03E-12 | 4.162463 | 3.39E+00 |
| Gxylt2    | 3.78E-05 | 2.32E+01 | 1.44E-06 | 2.276866 | 1.15E+00 |
| Cnn1      | 3.14E-17 | 8.05E+01 | 2.93E-19 | 2.935993 | 1.40E+00 |
| Acp5      | 1.31E-12 | 5.87E+01 | 1.87E-14 | 1.939266 | 1.82E+00 |
| Myl7      | 3.05E-27 | 1.27E+02 | 1.58E-29 | 4.514814 | 1.17E+00 |
| Ptprv     | 9.80E-17 | 7.81E+01 | 9.76E-19 | 0.597361 | 3.75E+00 |
| Grm4      | 1.71E-03 | 1.52E+01 | 9.89E-05 | 0.43853  | 1.31E+00 |
| Gdf10     | 8.64E-07 | 3.11E+01 | 2.48E-08 | -0.08998 | 2.37E+00 |
| Chodl     | 2.17E-14 | 6.70E+01 | 2.65E-16 | 0.289599 | 3.71E+00 |
| Kcnma1    | 7.40E-04 | 1.69E+01 | 3.85E-05 | 0.51407  | 1.79E+00 |
| Wispl     | 5.55E-08 | 3.68E+01 | 1.34E-09 | -0.15251 | 2.83E+00 |
| Ypel4     | 8.83E-05 | 2.15E+01 | 3.63E-06 | 1.816178 | 1.08E+00 |
| Olfm13    | 6.47E-17 | 7.90E+01 | 6.31E-19 | 3.718201 | 1.09E+00 |
| Jakmip3   | 4.93E-02 | 7.85E+00 | 5.08E-03 | -2.58728 | 4.23E+00 |
| Mir199a2  | 1.71E-02 | 1.02E+01 | 1.42E-03 | -0.88664 | 1.63E+00 |
| Ntrk3     | 1.14E-04 | 2.09E+01 | 4.78E-06 | 0.888534 | 1.36E+00 |
| Lnpep     | 2.84E-02 | 9.07E+00 | 2.60E-03 | 0.650927 | 1.44E+00 |
| Zfp383    | 4.56E-02 | 8.02E+00 | 4.61E-03 | -1.29939 | 2.28E+00 |
| AABR07065 | 6.95E-05 | 2.20E+01 | 2.79E-06 | -1.56152 | 4.12E+00 |
| Myl4      | 3.23E-78 | 3.64E+02 | 4.49E-81 | 3.766406 | 2.65E+00 |
| Nlrp3     | 2.23E-05 | 2.43E+01 | 8.16E-07 | 1.321428 | 1.34E+00 |
| Mepe      | 1.83E-06 | 2.95E+01 | 5.58E-08 | -0.51527 | 2.71E+00 |
| Mmp12     | 2.63E-05 | 2.40E+01 | 9.70E-07 | -1.29351 | 3.67E+00 |
| LOC100909 | 2.15E-02 | 9.68E+00 | 1.86E-03 | -2.44125 | 4.59E+00 |
| Sectm1b   | 1.26E-08 | 3.98E+01 | 2.76E-10 | -0.28101 | 3.45E+00 |
| Olr1      | 4.52E-02 | 8.05E+00 | 4.56E-03 | 0.353593 | 1.07E+00 |

|           |          |          |          |          |          |
|-----------|----------|----------|----------|----------|----------|
| Ccl12     | 4.27E-02 | 8.17E+00 | 4.26E-03 | -0.19889 | 1.23E+00 |
| Comp      | #####    | 9.42E+02 | #####    | 4.269184 | 4.74E+00 |
| Crlf1     | 2.56E-17 | 8.09E+01 | 2.35E-19 | 3.929631 | 1.10E+00 |
| Grem2     | 1.78E-03 | 1.51E+01 | 1.03E-04 | -0.75321 | 2.01E+00 |
| Ccdc80    | #####    | 4.88E+02 | #####    | 8.14283  | 1.14E+00 |
| Cldn4     | 1.75E-02 | 1.01E+01 | 1.45E-03 | -2.44509 | 4.57E+00 |
| Clec11a   | 1.19E-81 | 3.80E+02 | 1.47E-84 | 3.863041 | 2.82E+00 |
| Zfp697    | 3.61E-05 | 2.33E+01 | 1.38E-06 | -1.48158 | 6.24E+00 |
| Ina       | 1.27E-02 | 1.08E+01 | 9.94E-04 | -2.38149 | 4.70E+00 |
| Mmp9      | 4.60E-12 | 5.61E+01 | 6.78E-14 | 0.881583 | 2.65E+00 |
| Slit2     | 5.78E-06 | 2.71E+01 | 1.92E-07 | 2.139192 | 1.09E+00 |
| Grhl3     | 1.06E-03 | 1.62E+01 | 5.76E-05 | -0.84409 | 2.25E+00 |
| Xirp2     | 6.10E-79 | 3.67E+02 | 7.91E-82 | 8.966698 | 1.09E+00 |
| Clec2d    | 2.60E-16 | 7.61E+01 | 2.68E-18 | -0.35283 | 7.65E+00 |
| AABR07051 | 2.13E-03 | 1.47E+01 | 1.26E-04 | -2.09082 | 5.26E+00 |
| Dnah7     | 1.25E-08 | 3.99E+01 | 2.72E-10 | 2.420168 | 1.23E+00 |
| Ngef      | 1.32E-02 | 1.07E+01 | 1.05E-03 | 0.655218 | 1.08E+00 |
| Tnmd      | 3.11E-03 | 1.39E+01 | 1.95E-04 | -1.63103 | 3.16E+00 |
| Fstl3     | 1.56E-07 | 3.46E+01 | 3.99E-09 | 2.824591 | 1.15E+00 |
| B4gat1    | 2.44E-02 | 9.40E+00 | 2.17E-03 | -2.19303 | 3.03E+00 |
| Prkg2     | 3.90E-04 | 1.83E+01 | 1.87E-05 | -2.08402 | 5.28E+00 |
| Slc1a7    | 2.28E-17 | 8.12E+01 | 2.08E-19 | 3.091449 | 1.31E+00 |
| Bmpr1b    | 3.25E-03 | 1.38E+01 | 2.05E-04 | -1.41666 | 2.49E+00 |
| Nppb      | #####    | 5.70E+02 | #####    | 8.117551 | 1.29E+00 |
| Ibsp      | 1.93E-30 | 1.42E+02 | 8.56E-33 | 1.919439 | 3.39E+00 |
| Gpr27     | 2.23E-02 | 9.61E+00 | 1.94E-03 | 1.015904 | 1.13E+00 |
| Tcf23     | 4.78E-03 | 1.30E+01 | 3.19E-04 | -0.65651 | 1.70E+00 |
| Nbl1      | 2.20E-81 | 3.78E+02 | 2.78E-84 | 5.392774 | 1.43E+00 |
| Il1r12    | 4.07E-02 | 8.28E+00 | 4.02E-03 | -1.62861 | 2.13E+00 |
| Cfap69    | 2.21E-03 | 1.46E+01 | 1.31E-04 | 0.938127 | 1.15E+00 |
| Dlx5      | 2.17E-02 | 9.66E+00 | 1.88E-03 | 0.371872 | 1.06E+00 |
| Arnt12    | 3.55E-05 | 2.34E+01 | 1.35E-06 | -0.87136 | 2.95E+00 |
| Mmp13     | 2.35E-20 | 9.51E+01 | 1.81E-22 | 0.211689 | 6.34E+00 |
| Kcna6     | 4.28E-08 | 3.73E+01 | 1.01E-09 | -0.87204 | 4.24E+00 |
| Pmfbp1    | 1.86E-04 | 1.99E+01 | 8.15E-06 | -0.84814 | 2.47E+00 |
| Gba3      | 4.21E-03 | 1.32E+01 | 2.77E-04 | -0.47244 | 1.60E+00 |
| Ankrd23   | #####    | 1.14E+03 | #####    | 5.84394  | 2.25E+00 |
| RGD156265 | 4.99E-02 | 7.83E+00 | 5.15E-03 | 0.652564 | 1.03E+00 |
| Prrx1     | 6.56E-07 | 3.17E+01 | 1.84E-08 | 2.539744 | 1.09E+00 |
| Cacna1a   | 3.12E-25 | 1.18E+02 | 1.74E-27 | 4.242774 | 1.23E+00 |
| Vcan      | 1.20E-28 | 1.34E+02 | 5.95E-31 | 5.034493 | 1.01E+00 |
| Fbln2     | 1.89E-90 | 4.20E+02 | 2.04E-93 | 6.816823 | 1.12E+00 |
| Uts2r     | 4.98E-03 | 1.29E+01 | 3.36E-04 | -1.11152 | 2.07E+00 |
| Abca4     | 1.13E-03 | 1.61E+01 | 6.16E-05 | 0.079555 | 1.66E+00 |
| Il1dr2    | 2.42E-09 | 4.32E+01 | 4.85E-11 | 0.270103 | 2.73E+00 |
| Tpm2      | 6.95E-84 | 3.90E+02 | 7.93E-87 | 5.566953 | 1.41E+00 |
| Lrrc17    | 1.58E-06 | 2.98E+01 | 4.72E-08 | 2.47483  | 1.01E+00 |
| Igfbp6    | #####    | 4.92E+02 | #####    | 5.420876 | 1.87E+00 |
| Rbm44     | 1.20E-08 | 3.99E+01 | 2.62E-10 | 1.004047 | 1.88E+00 |
| Robo2     | 2.50E-08 | 3.84E+01 | 5.72E-10 | 0.713001 | 2.08E+00 |
| Pdgfr1    | 2.59E-11 | 5.26E+01 | 4.09E-13 | 3.123297 | 1.25E+00 |
| Phyhip1   | 1.64E-03 | 1.53E+01 | 9.42E-05 | -0.10573 | 1.74E+00 |
| Itgal1    | 7.15E-11 | 5.05E+01 | 1.19E-12 | 2.043043 | 1.67E+00 |
| Scn3b     | 4.13E-17 | 7.99E+01 | 3.96E-19 | 2.321545 | 1.81E+00 |

|           |          |          |          |          |          |
|-----------|----------|----------|----------|----------|----------|
| Plekhg4   | 3.62E-02 | 8.54E+00 | 3.47E-03 | -1.84607 | 2.79E+00 |
| LOC100910 | 1.85E-02 | 1.00E+01 | 1.56E-03 | 1.031496 | 2.09E+00 |
| Fgf23     | 4.25E-02 | 8.18E+00 | 4.23E-03 | -1.24841 | 1.85E+00 |
| Aebp1     | #####    | 5.19E+02 | #####    | 6.292016 | 1.28E+00 |
| LOC103689 | 2.99E-02 | 8.95E+00 | 2.77E-03 | 2.261827 | 1.54E+00 |
| Lox11     | 1.31E-63 | 2.96E+02 | 2.51E-66 | 5.659651 | 1.56E+00 |
| Nlrp10    | 9.37E-03 | 1.15E+01 | 7.02E-04 | -0.70018 | 1.63E+00 |
| Adh7      | 2.95E-09 | 4.28E+01 | 5.97E-11 | 1.058637 | 2.09E+00 |
| Osr1      | 6.08E-19 | 8.85E+01 | 5.01E-21 | 2.409355 | 1.88E+00 |
| Lilrb4    | 2.14E-08 | 3.88E+01 | 4.82E-10 | 2.03327  | 1.48E+00 |
| RGD130564 | 2.93E-13 | 6.17E+01 | 3.93E-15 | 2.512564 | 1.53E+00 |
| Scara5    | 4.73E-36 | 1.68E+02 | 1.68E-38 | 5.035703 | 1.02E+00 |
| Igsf10    | 1.11E-78 | 3.66E+02 | 1.50E-81 | 4.65024  | 1.83E+00 |
| Tceal5    | 6.86E-13 | 6.00E+01 | 9.55E-15 | 0.923789 | 2.65E+00 |
| Bcat1     | 8.11E-17 | 7.85E+01 | 7.99E-19 | 2.623784 | 1.70E+00 |
| Bgn       | #####    | 1.31E+03 | #####    | 7.963918 | 1.90E+00 |
| Phex      | 1.83E-04 | 1.99E+01 | 8.04E-06 | -1.63322 | 4.01E+00 |
| Cxcl1     | 2.95E-05 | 2.37E+01 | 1.10E-06 | 1.175433 | 1.40E+00 |
| Prss35    | 4.88E-02 | 7.87E+00 | 5.01E-03 | -0.28543 | 1.18E+00 |
| Chi311    | 4.95E-49 | 2.29E+02 | 1.25E-51 | 3.870989 | 2.22E+00 |
| Col9a3    | 8.85E-12 | 5.48E+01 | 1.34E-13 | 0.991182 | 2.43E+00 |
| Fhad1     | 2.02E-04 | 1.97E+01 | 8.96E-06 | 0.047965 | 1.79E+00 |
| Prph      | 2.43E-14 | 6.68E+01 | 2.98E-16 | 2.993717 | 1.23E+00 |
| Nkd1      | 1.66E-06 | 2.97E+01 | 4.99E-08 | 1.672533 | 1.37E+00 |
| AABR07066 | 3.68E-04 | 1.84E+01 | 1.75E-05 | -0.03849 | 4.67E+00 |
| Pcdhac1   | 1.07E-07 | 3.54E+01 | 2.66E-09 | 1.865486 | 1.38E+00 |
| Fez1      | 6.88E-05 | 2.20E+01 | 2.76E-06 | 0.65595  | 1.54E+00 |
| Klra5     | 1.40E-02 | 1.06E+01 | 1.12E-03 | -1.14682 | 2.02E+00 |
| Fbln7     | 2.25E-13 | 6.23E+01 | 2.98E-15 | 0.903724 | 2.62E+00 |
| S100b     | 3.35E-09 | 4.26E+01 | 6.84E-11 | 1.427774 | 1.83E+00 |
| Lgi4      | 1.00E-23 | 1.11E+02 | 6.11E-26 | 3.850244 | 1.28E+00 |
| Scube3    | 1.39E-06 | 3.01E+01 | 4.13E-08 | 1.193813 | 1.66E+00 |
| Marf1     | 5.34E-03 | 1.27E+01 | 3.64E-04 | 2.095671 | 1.38E+00 |
| Cpxm1     | 1.70E-34 | 1.61E+02 | 6.49E-37 | 3.777297 | 1.57E+00 |
| Pcdhb7    | 9.34E-03 | 1.15E+01 | 6.99E-04 | -0.28371 | 1.46E+00 |
| Stx1b     | 4.40E-02 | 8.11E+00 | 4.41E-03 | -1.0344  | 1.77E+00 |
| Igsf11    | 2.63E-02 | 9.24E+00 | 2.36E-03 | 0.449085 | 1.07E+00 |
| LOC102553 | 4.75E-02 | 7.94E+00 | 4.84E-03 | -2.58951 | 4.22E+00 |
| Sfrp4     | 2.91E-09 | 4.29E+01 | 5.89E-11 | 0.495153 | 2.82E+00 |
| Pnoc      | 1.44E-02 | 1.06E+01 | 1.16E-03 | -1.44998 | 2.08E+00 |
| Lingo1    | 1.44E-03 | 1.55E+01 | 8.05E-05 | 0.810376 | 1.17E+00 |
| Rprm      | 7.79E-03 | 1.19E+01 | 5.64E-04 | -1.26497 | 2.71E+00 |
| Aox1      | 1.41E-35 | 1.66E+02 | 5.18E-38 | 4.2943   | 1.52E+00 |
| Fam46c    | 1.76E-12 | 5.81E+01 | 2.51E-14 | 2.530671 | 1.53E+00 |
| Pappa2    | 2.72E-21 | 9.95E+01 | 1.97E-23 | 0.723726 | 4.22E+00 |
| Tcp1lx2   | 1.49E-02 | 1.05E+01 | 1.21E-03 | -2.08371 | 3.25E+00 |
| P2rx2     | 3.97E-03 | 1.34E+01 | 2.58E-04 | -1.75534 | 2.95E+00 |
| Brinp2    | 1.64E-02 | 1.03E+01 | 1.34E-03 | -0.73794 | 1.57E+00 |
| LOC100911 | 4.01E-03 | 1.33E+01 | 2.61E-04 | 0.512316 | 4.88E+00 |
| Bnc2      | 1.18E-07 | 3.52E+01 | 2.97E-09 | 0.288253 | 2.27E+00 |
| Ppp2r2b   | 7.43E-03 | 1.20E+01 | 5.31E-04 | 0.112301 | 1.50E+00 |
| Nalcn     | 2.85E-04 | 1.90E+01 | 1.31E-05 | 0.775373 | 1.31E+00 |
| Itga8     | 4.10E-16 | 7.52E+01 | 4.32E-18 | 3.118603 | 1.22E+00 |
| Podn11    | 1.91E-02 | 9.93E+00 | 1.63E-03 | -1.04104 | 1.75E+00 |

|           |          |          |          |          |          |
|-----------|----------|----------|----------|----------|----------|
| Slc27a2   | 1.60E-02 | 1.03E+01 | 1.31E-03 | -0.03294 | 1.27E+00 |
| AABR07013 | 1.86E-03 | 1.50E+01 | 1.08E-04 | -1.17709 | 2.51E+00 |
| Tnfrsf12a | 2.05E-15 | 7.19E+01 | 2.30E-17 | 3.363863 | 1.09E+00 |
| Mgp       | #####    | 9.97E+02 | #####    | 8.84249  | 1.71E+00 |
| Espn      | 1.49E-02 | 1.05E+01 | 1.21E-03 | -1.5585  | 2.26E+00 |
| Mrgprx3   | 2.12E-02 | 9.72E+00 | 1.82E-03 | -1.42063 | 2.13E+00 |
| Slc27a6   | 7.71E-04 | 1.68E+01 | 4.05E-05 | -0.77685 | 2.36E+00 |
| Cilp2     | 6.66E-23 | 1.07E+02 | 4.38E-25 | 1.8907   | 2.97E+00 |
| Thbs3     | 1.16E-13 | 6.36E+01 | 1.49E-15 | 3.243842 | 1.09E+00 |
| Frzb      | 2.52E-08 | 3.84E+01 | 5.76E-10 | 2.634178 | 1.13E+00 |
| Tgfb2     | 4.09E-29 | 1.36E+02 | 1.96E-31 | 4.411976 | 1.42E+00 |
| C3ar1     | 4.20E-03 | 1.32E+01 | 2.76E-04 | 1.202107 | 1.11E+00 |
| Adcy7     | 1.20E-23 | 1.11E+02 | 7.38E-26 | 3.930436 | 1.30E+00 |
| RGD131108 | 3.59E-02 | 8.56E+00 | 3.44E-03 | -0.23233 | 1.19E+00 |
| Asic4     | 3.23E-03 | 1.38E+01 | 2.03E-04 | -1.4165  | 2.49E+00 |
| Thyl      | 1.93E-17 | 8.15E+01 | 1.74E-19 | 2.229123 | 2.01E+00 |
| Fst       | 1.19E-06 | 3.04E+01 | 3.48E-08 | 0.83104  | 1.68E+00 |
| Hoxb6     | 1.66E-02 | 1.02E+01 | 1.37E-03 | -0.74408 | 1.85E+00 |
| Maoa      | #####    | 1.14E+03 | #####    | 8.774505 | 1.97E+00 |
| Reep2     | 2.32E-02 | 9.51E+00 | 2.04E-03 | -1.14074 | 1.81E+00 |
| Pon3      | 2.81E-05 | 2.38E+01 | 1.05E-06 | 1.002068 | 1.60E+00 |
| Ndst2     | 4.83E-02 | 7.89E+00 | 4.96E-03 | -0.40415 | 1.38E+00 |
| Slcola4   | 6.84E-03 | 1.22E+01 | 4.85E-04 | -2.31598 | 4.84E+00 |
| Col2a1    | #####    | 1.25E+03 | #####    | 4.305869 | 7.09E+00 |
| Krt8      | 8.00E-04 | 1.68E+01 | 4.24E-05 | -0.34254 | 1.91E+00 |
| Esyt3     | 2.90E-04 | 1.90E+01 | 1.34E-05 | 0.483753 | 1.49E+00 |
| LOC100910 | 4.83E-02 | 7.89E+00 | 4.97E-03 | -0.24    | 3.03E+00 |
| Msln      | 8.74E-04 | 1.66E+01 | 4.67E-05 | 0.373415 | 1.44E+00 |
| Ephb2     | 2.84E-02 | 9.07E+00 | 2.60E-03 | -0.25733 | 1.24E+00 |
| LOC100361 | 4.32E-02 | 8.15E+00 | 4.31E-03 | -2.58673 | 4.23E+00 |
| Fstl1     | 1.29E-93 | 4.35E+02 | 1.32E-96 | 6.721257 | 1.11E+00 |
| Lum       | 1.15E-87 | 4.08E+02 | 1.28E-90 | 7.281672 | 1.04E+00 |
| Pi15      | 3.79E-03 | 1.35E+01 | 2.44E-04 | -0.08016 | 1.43E+00 |
| AABR07051 | 7.10E-03 | 1.21E+01 | 5.07E-04 | -1.71135 | 3.04E+00 |
| Tlcd2     | 1.94E-03 | 1.49E+01 | 1.13E-04 | -1.48188 | 2.82E+00 |
| Uchl1     | 9.63E-28 | 1.30E+02 | 4.81E-30 | 1.129174 | 4.50E+00 |
| Ctgf      | #####    | 1.35E+03 | #####    | 7.611421 | 1.91E+00 |
| Atp10a    | 1.62E-06 | 2.98E+01 | 4.84E-08 | 2.452412 | 1.03E+00 |
| Sfrpl     | 2.52E-27 | 1.28E+02 | 1.29E-29 | 4.053609 | 1.36E+00 |
| Fgl2      | 1.13E-31 | 1.48E+02 | 4.73E-34 | 5.335263 | 1.02E+00 |
| Rn50_5_08 | 1.78E-02 | 1.01E+01 | 1.49E-03 | -2.51522 | 4.41E+00 |
| Nudt11    | 8.96E-03 | 1.16E+01 | 6.66E-04 | -1.47957 | 2.39E+00 |
| Fam180a   | 4.96E-21 | 9.83E+01 | 3.63E-23 | 1.507516 | 3.33E+00 |
| C4b       | #####    | 9.74E+02 | #####    | 5.645272 | 2.19E+00 |
| Cd16311   | 1.51E-05 | 2.51E+01 | 5.36E-07 | -0.25117 | 2.56E+00 |
| Rnd1      | 4.79E-32 | 1.50E+02 | 1.96E-34 | 3.693575 | 1.50E+00 |
| Apopt1    | 1.48E-03 | 1.55E+01 | 8.32E-05 | 2.002886 | 2.35E+00 |
| LOC259244 | 1.34E-02 | 1.07E+01 | 1.06E-03 | -0.8648  | 1.86E+00 |
| Camklg    | 9.85E-03 | 1.14E+01 | 7.45E-04 | -2.44399 | 4.57E+00 |
| LOC299282 | 1.53E-13 | 6.31E+01 | 1.99E-15 | 2.07069  | 1.94E+00 |
| LOC100910 | 4.59E-02 | 8.01E+00 | 4.65E-03 | -0.71069 | 1.61E+00 |
| Cdh22     | 1.72E-06 | 2.96E+01 | 5.21E-08 | 2.061518 | 1.21E+00 |
| Ifit1     | 5.43E-36 | 1.68E+02 | 1.98E-38 | 4.444898 | 1.34E+00 |
| Klhl29    | 1.27E-08 | 3.98E+01 | 2.78E-10 | 1.426973 | 1.72E+00 |

|           |          |          |          |          |          |
|-----------|----------|----------|----------|----------|----------|
| Mpz12     | 2.72E-03 | 1.42E+01 | 1.67E-04 | -0.98656 | 2.27E+00 |
| Ppic      | 1.64E-16 | 7.70E+01 | 1.67E-18 | 4.041066 | 1.04E+00 |
| Exoc3l2   | 3.06E-03 | 1.39E+01 | 1.91E-04 | 0.519083 | 1.23E+00 |
| Syp12     | 1.55E-11 | 5.37E+01 | 2.37E-13 | 1.163502 | 2.22E+00 |
| Ch25h     | 2.35E-04 | 1.94E+01 | 1.06E-05 | 1.192253 | 1.24E+00 |
| Tex15     | 1.07E-02 | 1.12E+01 | 8.26E-04 | -1.75832 | 2.94E+00 |
| Epn3      | 3.66E-09 | 4.24E+01 | 7.55E-11 | 1.76808  | 1.71E+00 |
| LOC100361 | 2.41E-02 | 9.43E+00 | 2.13E-03 | 0.91373  | 1.04E+00 |
| AABR07027 | 9.34E-03 | 1.15E+01 | 6.99E-04 | -2.19882 | 5.06E+00 |
| Obp3      | 5.96E-04 | 1.74E+01 | 3.03E-05 | -1.88307 | 5.64E+00 |
| Aff2      | 3.43E-04 | 1.86E+01 | 1.62E-05 | -0.61085 | 2.39E+00 |
| Mpz       | 1.27E-08 | 3.98E+01 | 2.79E-10 | 2.218205 | 1.47E+00 |
| C1qtnf7   | 1.29E-23 | 1.10E+02 | 8.08E-26 | 3.965099 | 1.21E+00 |
| Gdf15     | 6.44E-12 | 5.54E+01 | 9.65E-14 | 1.213935 | 2.50E+00 |
| Bcan      | 2.72E-02 | 9.17E+00 | 2.46E-03 | -0.64809 | 1.57E+00 |
| Tubb3     | 1.26E-02 | 1.09E+01 | 9.84E-04 | 0.771054 | 1.07E+00 |
| LOC100912 | #####    | 7.80E+02 | #####    | 4.911282 | 2.45E+00 |
| Colla1    | 1.11E-78 | 3.66E+02 | 1.48E-81 | 9.007469 | 1.36E+00 |
| Prelp     | #####    | 5.52E+02 | #####    | 6.739396 | 1.24E+00 |
| Vill      | 2.74E-03 | 1.42E+01 | 1.68E-04 | -0.37778 | 1.73E+00 |
| Gap43     | 6.23E-05 | 2.22E+01 | 2.48E-06 | 0.891224 | 1.57E+00 |
| Pcdhb3    | 2.58E-02 | 9.29E+00 | 2.31E-03 | 0.292299 | 1.04E+00 |
| LOC100911 | 1.23E-03 | 1.59E+01 | 6.78E-05 | -0.4265  | 3.08E+00 |
| Upk1b     | 4.66E-03 | 1.30E+01 | 3.10E-04 | -0.87072 | 2.20E+00 |
| Myh3      | 1.08E-06 | 3.06E+01 | 3.15E-08 | -0.83135 | 4.28E+00 |
| Fbxo17    | 7.97E-05 | 2.17E+01 | 3.25E-06 | -0.27947 | 2.11E+00 |
| Hk3       | 8.81E-07 | 3.10E+01 | 2.54E-08 | 0.374696 | 2.00E+00 |
| Lrrc16a   | 1.68E-10 | 4.88E+01 | 2.89E-12 | 3.655052 | 1.10E+00 |
| Tsku      | 8.75E-17 | 7.83E+01 | 8.64E-19 | 3.014294 | 1.35E+00 |
| Il6       | 2.98E-02 | 8.96E+00 | 2.75E-03 | -1.88736 | 2.71E+00 |
| Bmp3      | 3.17E-03 | 1.38E+01 | 1.99E-04 | -1.48299 | 2.83E+00 |
| Prima1    | 5.00E-08 | 3.70E+01 | 1.19E-09 | 1.756642 | 1.54E+00 |
| Fibin     | 1.44E-82 | 3.84E+02 | 1.69E-85 | 4.325151 | 2.47E+00 |
| Tmem178a  | 1.35E-03 | 1.57E+01 | 7.52E-05 | 1.324926 | 1.06E+00 |
| Mt2A      | 1.90E-20 | 9.55E+01 | 1.45E-22 | 3.893302 | 1.27E+00 |
| C4a       | 1.06E-02 | 1.12E+01 | 8.11E-04 | 0.613451 | 1.15E+00 |
| Prdm6     | 1.61E-03 | 1.53E+01 | 9.21E-05 | 0.178863 | 1.45E+00 |
| Coll10a1  | 3.65E-21 | 9.89E+01 | 2.66E-23 | 0.857237 | 4.20E+00 |
| C4a       | #####    | 7.73E+02 | #####    | 5.440913 | 2.56E+00 |
| Kenc3     | 1.92E-04 | 1.98E+01 | 8.45E-06 | 0.488943 | 1.65E+00 |
| Ephx4     | 1.77E-02 | 1.01E+01 | 1.48E-03 | -1.1733  | 1.96E+00 |
| Srpx2     | 1.55E-09 | 4.42E+01 | 3.01E-11 | 2.00195  | 1.51E+00 |
| Spp1      | #####    | 7.75E+02 | #####    | 4.42082  | 4.23E+00 |
| Col9a1    | 6.42E-07 | 3.17E+01 | 1.80E-08 | -0.65504 | 3.24E+00 |
| Zfp365    | 4.55E-04 | 1.80E+01 | 2.24E-05 | 1.820837 | 1.01E+00 |
| Gng8      | 4.15E-08 | 3.74E+01 | 9.73E-10 | 1.232196 | 1.71E+00 |
| C3        | 3.05E-16 | 7.58E+01 | 3.17E-18 | 2.236125 | 1.91E+00 |
| Shc4      | 1.87E-02 | 9.99E+00 | 1.58E-03 | -1.63789 | 2.56E+00 |
| Hoxb3     | 3.11E-05 | 2.36E+01 | 1.17E-06 | 1.625089 | 1.23E+00 |
| Tnn       | 2.38E-22 | 1.04E+02 | 1.62E-24 | 0.619364 | 5.46E+00 |
| Nacad     | 1.61E-02 | 1.03E+01 | 1.33E-03 | 0.494396 | 1.01E+00 |
| Bglap     | 5.14E-31 | 1.45E+02 | 2.24E-33 | 1.243096 | 5.45E+00 |
| Cc17      | 1.64E-03 | 1.53E+01 | 9.39E-05 | 1.274988 | 1.06E+00 |
| Pex5      | 4.21E-02 | 8.21E+00 | 4.18E-03 | -0.90838 | 4.16E+00 |

|           |          |          |          |          |          |
|-----------|----------|----------|----------|----------|----------|
| Fam198a   | 6.08E-04 | 1.74E+01 | 3.09E-05 | 1.592889 | 1.11E+00 |
| Gcnt4     | 1.38E-02 | 1.06E+01 | 1.11E-03 | -1.84387 | 2.80E+00 |
| Clec3b    | 1.04E-72 | 3.38E+02 | 1.66E-75 | 5.28123  | 1.43E+00 |
| LOC691970 | 2.71E-04 | 1.91E+01 | 1.24E-05 | -0.00751 | 1.96E+00 |
| Col8a1    | #####    | 1.03E+03 | #####    | 5.573256 | 2.33E+00 |
| Tspan17   | 6.61E-04 | 1.72E+01 | 3.41E-05 | 1.619747 | 1.04E+00 |
| Panx3     | 3.68E-04 | 1.84E+01 | 1.75E-05 | -1.93834 | 5.52E+00 |
| AABR07065 | 4.40E-02 | 8.10E+00 | 4.42E-03 | -1.83114 | 2.83E+00 |
| Nppa      | 0.00E+00 | 3.16E+03 | 0.00E+00 | 9.948681 | 3.99E+00 |
| Rn50_15_C | 3.09E-06 | 2.84E+01 | 9.83E-08 | 0.286416 | 2.04E+00 |
| Slit3     | 5.07E-17 | 7.95E+01 | 4.88E-19 | 4.066421 | 1.02E+00 |
| Nhs       | 6.49E-03 | 1.23E+01 | 4.57E-04 | 0.8784   | 1.06E+00 |
| Pak1      | 7.09E-05 | 2.19E+01 | 2.86E-06 | 1.262847 | 1.39E+00 |
| Serping1  | #####    | 5.12E+02 | #####    | 6.960551 | 1.18E+00 |
| Ly6g6e    | 2.33E-03 | 1.45E+01 | 1.39E-04 | -1.07129 | 2.38E+00 |
| Adamts16  | 2.91E-02 | 9.02E+00 | 2.68E-03 | -2.44673 | 4.55E+00 |
| Slc41a2   | 5.54E-08 | 3.68E+01 | 1.34E-09 | 1.035865 | 1.80E+00 |
| AABR07060 | 2.60E-71 | 3.32E+02 | 4.42E-74 | 4.041321 | 2.26E+00 |
| Chrd11    | 1.90E-04 | 1.99E+01 | 8.34E-06 | 2.117002 | 1.04E+00 |
| RT1-CE6   | 3.59E-03 | 1.36E+01 | 2.30E-04 | -1.93178 | 3.52E+00 |
| Illrn     | 1.22E-03 | 1.59E+01 | 6.71E-05 | 0.749669 | 1.27E+00 |
| Has1      | 3.35E-05 | 2.35E+01 | 1.27E-06 | 0.995515 | 1.50E+00 |
| Myh4      | 1.45E-04 | 2.04E+01 | 6.22E-06 | 0.88506  | 1.42E+00 |
| Pamr1     | 3.56E-02 | 8.59E+00 | 3.39E-03 | 0.160281 | 1.11E+00 |
| Cacna1b   | 1.95E-02 | 9.89E+00 | 1.66E-03 | -2.44838 | 4.55E+00 |
| Slc7a3    | 1.22E-02 | 1.09E+01 | 9.50E-04 | -2.44454 | 4.57E+00 |
| Pcdha3    | 3.30E-02 | 8.74E+00 | 3.11E-03 | -0.29596 | 1.26E+00 |
| Catsperg1 | 3.05E-06 | 2.84E+01 | 9.69E-08 | 0.944997 | 1.60E+00 |
| Mdk       | 4.31E-36 | 1.69E+02 | 1.52E-38 | 3.591851 | 1.76E+00 |
| RGD131174 | 5.24E-36 | 1.68E+02 | 1.89E-38 | 3.465709 | 1.68E+00 |
| S100a4    | 8.14E-21 | 9.73E+01 | 6.08E-23 | 4.471835 | 1.02E+00 |
| Myrf      | 1.28E-05 | 2.55E+01 | 4.48E-07 | 1.742115 | 1.24E+00 |
| Sez6l     | 3.60E-02 | 8.55E+00 | 3.45E-03 | 0.092986 | 1.07E+00 |
| 1500009L1 | 2.25E-02 | 9.59E+00 | 1.96E-03 | -1.00747 | 1.62E+00 |
| Agmo      | 1.10E-02 | 1.11E+01 | 8.47E-04 | -0.34793 | 1.58E+00 |
| Bend6     | 1.44E-04 | 2.04E+01 | 6.15E-06 | 1.176027 | 1.45E+00 |
| Sln       | 3.21E-29 | 1.37E+02 | 1.51E-31 | 2.136228 | 2.78E+00 |
| Ccdc3     | 1.50E-02 | 1.05E+01 | 1.22E-03 | 0.928913 | 1.12E+00 |
| Dnah2     | 1.58E-02 | 1.03E+01 | 1.30E-03 | -1.63564 | 2.57E+00 |
| Efna3     | 1.13E-02 | 1.11E+01 | 8.71E-04 | -2.44564 | 4.57E+00 |
| Coll2a1   | 2.17E-55 | 2.58E+02 | 5.03E-58 | 3.397298 | 2.33E+00 |
| Pcgf1     | 5.30E-04 | 1.76E+01 | 2.67E-05 | 0.227269 | 2.05E+00 |
| Krt18     | 1.45E-10 | 4.91E+01 | 2.48E-12 | -0.60538 | 4.57E+00 |
| Adamts17  | 6.81E-04 | 1.71E+01 | 3.52E-05 | 0.764303 | 1.39E+00 |
| Wisp2     | 0.00E+00 | 1.70E+03 | 0.00E+00 | 4.868408 | 4.96E+00 |
| Dhrs9     | 3.61E-02 | 8.55E+00 | 3.45E-03 | -0.52523 | 1.41E+00 |
| AABR07051 | 9.64E-03 | 1.14E+01 | 7.26E-04 | -2.31813 | 4.83E+00 |
| Igh-6     | 2.61E-09 | 4.31E+01 | 5.25E-11 | 2.360949 | 1.37E+00 |
| C2        | 8.34E-22 | 1.02E+02 | 5.87E-24 | 3.816448 | 1.29E+00 |
| AABR07051 | 4.24E-02 | 8.19E+00 | 4.21E-03 | -2.2501  | 2.91E+00 |
| Dupd1     | 2.24E-02 | 9.59E+00 | 1.96E-03 | 0.170185 | 1.35E+00 |
| Pcdhb2    | 2.67E-02 | 9.21E+00 | 2.40E-03 | -0.43816 | 1.33E+00 |
| Cpeb1     | 1.18E-24 | 1.15E+02 | 6.87E-27 | 2.410295 | 2.20E+00 |
| Rplp2     | 4.77E-02 | 7.92E+00 | 4.89E-03 | 4.127533 | 1.61E+00 |



|           |          |          |          |          |          |
|-----------|----------|----------|----------|----------|----------|
| Crtac1    | 3.64E-04 | 1.85E+01 | 1.73E-05 | -0.25443 | 1.93E+00 |
| Fbln1     | #####    | 9.67E+02 | #####    | 7.143437 | 1.60E+00 |
| MGC105649 | 8.30E-09 | 4.07E+01 | 1.77E-10 | 2.412496 | 1.23E+00 |
| Adig      | 4.79E-02 | 7.91E+00 | 4.90E-03 | -1.67606 | 3.93E+00 |
| Tgfa      | 1.75E-14 | 6.75E+01 | 2.11E-16 | 1.212598 | 2.56E+00 |
| AABR07051 | 1.40E-02 | 1.06E+01 | 1.12E-03 | -1.84667 | 3.65E+00 |
| No18      | 9.71E-04 | 1.64E+01 | 5.23E-05 | 0.069394 | 2.06E+00 |
| Plod2     | 3.10E-45 | 2.11E+02 | 8.89E-48 | 4.807517 | 1.31E+00 |
| Fmod      | 4.28E-23 | 1.08E+02 | 2.77E-25 | 3.493343 | 1.30E+00 |
| Ahnak2    | 8.00E-94 | 4.36E+02 | 7.90E-97 | 4.804008 | 1.98E+00 |
| Hecw1     | 3.12E-02 | 8.86E+00 | 2.91E-03 | -2.38421 | 4.67E+00 |
| Vash2     | 3.84E-17 | 8.01E+01 | 3.65E-19 | 3.651158 | 1.13E+00 |
| LOC102552 | 1.02E-38 | 1.81E+02 | 3.38E-41 | 2.939837 | 2.30E+00 |
| Atpla3    | 1.77E-15 | 7.22E+01 | 1.97E-17 | 2.680827 | 1.46E+00 |
| Tnfrsf11b | 2.06E-04 | 1.97E+01 | 9.15E-06 | 1.790428 | 1.09E+00 |
| LOC689757 | 4.93E-03 | 1.29E+01 | 3.32E-04 | -0.66267 | 1.96E+00 |
| Pdcd5     | 5.71E-03 | 1.26E+01 | 3.94E-04 | 2.484206 | 3.09E+00 |
| Dact2     | 1.46E-05 | 2.52E+01 | 5.20E-07 | 0.99249  | 1.47E+00 |
| Cpxm2     | 2.68E-77 | 3.59E+02 | 3.80E-80 | 3.413935 | 2.82E+00 |
| Figf      | 4.40E-18 | 8.45E+01 | 3.81E-20 | 3.557405 | 1.14E+00 |
| Camkk1    | 7.62E-06 | 2.65E+01 | 2.59E-07 | 2.322285 | 1.03E+00 |
| RGD130492 | 5.15E-04 | 1.77E+01 | 2.58E-05 | 0.849994 | 1.23E+00 |
| Rn50_10_c | 2.28E-02 | 9.55E+00 | 2.00E-03 | -2.51466 | 4.41E+00 |
| Myl1      | 3.96E-30 | 1.41E+02 | 1.77E-32 | 2.298344 | 2.76E+00 |
| Wscd2     | 1.02E-02 | 1.13E+01 | 7.76E-04 | -0.67966 | 1.67E+00 |
| Clec3a    | 2.31E-39 | 1.84E+02 | 7.43E-42 | 1.520865 | 6.44E+00 |
| Pgbd5     | 5.52E-05 | 2.24E+01 | 2.17E-06 | -1.8892  | 5.61E+00 |
| Fn1       | 1.65E-76 | 3.56E+02 | 2.45E-79 | 7.158078 | 1.05E+00 |
| Lrrn4c1   | 2.41E-02 | 9.43E+00 | 2.13E-03 | 0.591039 | 1.07E+00 |
| Kcnj9     | 3.31E-02 | 8.73E+00 | 3.13E-03 | -0.86154 | 1.51E+00 |
| Akip1     | 9.93E-63 | 2.92E+02 | 1.96E-65 | 4.588187 | 1.70E+00 |
| Timp1     | 9.92E-39 | 1.81E+02 | 3.24E-41 | 3.938892 | 1.59E+00 |
| Serpine2  | #####    | 6.63E+02 | #####    | 6.297844 | 1.46E+00 |
| Rxfp1     | 1.69E-34 | 1.61E+02 | 6.42E-37 | 2.871092 | 2.42E+00 |
| Dpys14    | 3.49E-04 | 1.86E+01 | 1.65E-05 | 0.746961 | 1.35E+00 |
| Lbp       | 9.68E-22 | 1.02E+02 | 6.87E-24 | 3.844461 | 1.44E+00 |
| Fuom      | 2.69E-02 | 9.20E+00 | 2.42E-03 | 1.146911 | 3.10E+00 |
| Coll4a1   | 3.70E-82 | 3.82E+02 | 4.45E-85 | 6.516815 | 1.04E+00 |
| Aldh3a1   | 2.77E-07 | 3.34E+01 | 7.39E-09 | 2.226972 | 1.33E+00 |
| AABR07051 | 3.77E-02 | 8.45E+00 | 3.65E-03 | -2.51411 | 4.41E+00 |
| LOC257642 | 2.20E-02 | 9.64E+00 | 1.90E-03 | -2.51577 | 4.40E+00 |
| Ptgis     | 6.31E-43 | 2.00E+02 | 1.89E-45 | 5.187508 | 1.09E+00 |
| Atp6v0d2  | 1.21E-02 | 1.09E+01 | 9.48E-04 | -2.44454 | 4.57E+00 |
| Gpnmnb    | 4.95E-49 | 2.29E+02 | 1.24E-51 | 4.62392  | 1.45E+00 |
| RGD156184 | 5.31E-11 | 5.11E+01 | 8.71E-13 | 0.692922 | 2.48E+00 |
| Rel12     | 2.27E-02 | 9.56E+00 | 1.99E-03 | -2.4429  | 4.58E+00 |
| Islr      | #####    | 7.86E+02 | #####    | 5.45005  | 2.12E+00 |
| LOC100912 | 1.98E-06 | 2.93E+01 | 6.10E-08 | -0.03029 | 2.58E+00 |
| Scd       | 2.10E-06 | 2.92E+01 | 6.49E-08 | -0.20558 | 2.47E+00 |
| Tceal9    | 1.39E-59 | 2.77E+02 | 2.93E-62 | 5.657897 | 1.03E+00 |
| Tnnt1     | 4.46E-03 | 1.31E+01 | 2.95E-04 | 0.773424 | 1.07E+00 |
| Il17re    | 1.17E-10 | 4.95E+01 | 1.98E-12 | 0.32034  | 2.89E+00 |
| Tgfb3     | 3.46E-64 | 2.99E+02 | 6.51E-67 | 5.591945 | 1.11E+00 |
| Phf24     | 7.55E-15 | 6.92E+01 | 8.88E-17 | 3.942137 | 1.06E+00 |

|           |          |          |          |          |          |
|-----------|----------|----------|----------|----------|----------|
| AABR07025 | 2.27E-02 | 9.57E+00 | 1.98E-03 | -1.92992 | 2.65E+00 |
| Cdh3      | 2.99E-02 | 8.95E+00 | 2.77E-03 | -0.90589 | 1.97E+00 |
| Gpm6a     | 5.07E-15 | 7.00E+01 | 5.89E-17 | 3.069257 | 1.17E+00 |
| Cthrc1    | 1.81E-07 | 3.43E+01 | 4.66E-09 | 0.44326  | 2.57E+00 |
| NEWGENE_6 | 5.20E-04 | 1.77E+01 | 2.61E-05 | 0.559902 | 2.97E+00 |
| Tgm1      | 3.04E-09 | 4.28E+01 | 6.17E-11 | -0.07906 | 3.09E+00 |
| Olr1085   | 4.03E-03 | 1.33E+01 | 2.62E-04 | -2.31436 | 4.85E+00 |
| Sbsn      | 1.00E-29 | 1.39E+02 | 4.57E-32 | 2.607318 | 2.42E+00 |
| Hs3st2    | 1.36E-08 | 3.97E+01 | 3.00E-10 | -0.60112 | 4.56E+00 |
| Cacna2d3  | 3.89E-03 | 1.34E+01 | 2.51E-04 | -0.78598 | 2.34E+00 |
| Tbx15     | 1.19E-03 | 1.59E+01 | 6.51E-05 | -2.07982 | 5.30E+00 |
| LOC365238 | 3.28E-02 | 8.76E+00 | 3.08E-03 | -2.19041 | 3.04E+00 |
| Itgbl1    | 4.45E-56 | 2.61E+02 | 1.00E-58 | 5.620825 | 1.05E+00 |
| RGD131144 | 1.07E-03 | 1.62E+01 | 5.79E-05 | -0.91886 | 2.36E+00 |
| Antxr1    | 2.19E-25 | 1.19E+02 | 1.21E-27 | 3.882242 | 1.45E+00 |
| Nov       | 1.96E-44 | 2.07E+02 | 5.68E-47 | 3.79598  | 1.82E+00 |
| Acan      | 7.37E-43 | 2.00E+02 | 2.23E-45 | 1.720096 | 6.27E+00 |
| Matn4     | 1.48E-18 | 8.67E+01 | 1.25E-20 | 1.6647   | 2.72E+00 |
| Arhgef19  | 8.81E-03 | 1.16E+01 | 6.51E-04 | -0.35253 | 1.46E+00 |
| Fam114a11 | 8.50E-03 | 1.17E+01 | 6.24E-04 | 0.152937 | 1.29E+00 |
| Olr63     | 4.26E-03 | 1.32E+01 | 2.80E-04 | 0.978545 | 1.10E+00 |
| Il1b      | 1.77E-03 | 1.51E+01 | 1.03E-04 | 1.489058 | 1.02E+00 |
| N4bp3     | 6.45E-03 | 1.23E+01 | 4.53E-04 | 0.058639 | 1.63E+00 |
| LOC100909 | 1.89E-03 | 1.50E+01 | 1.10E-04 | 0.231626 | 1.87E+00 |
| Fcnb      | 1.55E-03 | 1.54E+01 | 8.77E-05 | 0.810834 | 1.17E+00 |
| Fcrl2     | 2.28E-17 | 8.12E+01 | 2.07E-19 | 0.925512 | 3.06E+00 |
| Slc9b2    | 3.89E-03 | 1.34E+01 | 2.51E-04 | -0.3346  | 1.82E+00 |
| LOC103690 | 1.48E-02 | 1.05E+01 | 1.19E-03 | 1.743527 | 2.48E+00 |
| Scg2      | 2.23E-04 | 1.95E+01 | 9.95E-06 | -1.98552 | 5.45E+00 |
| Ighv12-3  | 6.75E-05 | 2.20E+01 | 2.69E-06 | -1.51908 | 4.19E+00 |
| Rarres1   | 6.14E-17 | 7.91E+01 | 5.97E-19 | 2.810025 | 1.57E+00 |
| Clqtnf3   | 1.90E-10 | 4.85E+01 | 3.30E-12 | 0.33631  | 2.82E+00 |
| Ccl19     | 3.74E-06 | 2.80E+01 | 1.21E-07 | 1.942468 | 1.66E+00 |
| Sh2d4a    | 1.49E-05 | 2.52E+01 | 5.29E-07 | 2.255216 | 1.11E+00 |
| Col8a2    | 2.36E-75 | 3.50E+02 | 3.57E-78 | 3.696095 | 2.75E+00 |
| Capns1    | 3.41E-02 | 8.67E+00 | 3.23E-03 | 3.457336 | 1.68E+00 |
| Nr4a3     | 9.13E-16 | 7.35E+01 | 9.92E-18 | 2.420558 | #####    |
| Ccnj      | 2.76E-03 | 1.41E+01 | 1.69E-04 | -1.46754 | #####    |
| LOC100362 | 7.78E-03 | 1.19E+01 | 5.62E-04 | 1.747328 | #####    |
| Hhip      | 4.40E-02 | 8.10E+00 | 4.42E-03 | -2.50314 | #####    |
| Fam131c   | 1.10E-22 | 1.06E+02 | 7.24E-25 | 4.516776 | #####    |
| Myh6      | 1.42E-32 | 1.52E+02 | 5.70E-35 | 13.15967 | #####    |
| Zdbf2     | 2.98E-02 | 8.96E+00 | 2.76E-03 | -1.46158 | #####    |
| Psmel-ps1 | 8.06E-03 | 1.18E+01 | 5.87E-04 | 0.601397 | #####    |
| Grid1     | 1.60E-05 | 2.50E+01 | 5.71E-07 | 0.644109 | #####    |
| Epha3     | 1.69E-06 | 2.97E+01 | 5.09E-08 | 2.646792 | #####    |
| LOC103693 | 3.86E-02 | 8.40E+00 | 3.76E-03 | -2.65872 | #####    |
| Crybb1    | 3.51E-10 | 4.72E+01 | 6.34E-12 | 2.764344 | #####    |
| Smc1      | 4.38E-04 | 1.81E+01 | 2.14E-05 | -0.85342 | #####    |
| Ankrd24   | 3.65E-02 | 8.52E+00 | 3.51E-03 | 1.108259 | #####    |
| Nkrf      | 7.87E-03 | 1.19E+01 | 5.70E-04 | -0.09527 | #####    |
| Reg3g     | 2.12E-05 | 2.44E+01 | 7.69E-07 | -0.87964 | #####    |
| RGD156535 | 1.34E-31 | 1.48E+02 | 5.68E-34 | 4.079798 | #####    |
| Mc2r      | 3.59E-02 | 8.56E+00 | 3.43E-03 | -2.30147 | #####    |

|           |          |          |          |          |       |
|-----------|----------|----------|----------|----------|-------|
| Gata3     | 4.88E-02 | 7.87E+00 | 5.02E-03 | 0.088042 | ##### |
| Myo3b     | 2.45E-06 | 2.89E+01 | 7.70E-08 | 1.828626 | ##### |
| Zfp420    | 1.21E-04 | 2.08E+01 | 5.11E-06 | -0.79753 | ##### |
| Rack1     | 3.75E-02 | 8.46E+00 | 3.63E-03 | 0.718219 | ##### |
| Dcun1d2   | 8.57E-04 | 1.66E+01 | 4.56E-05 | 2.519624 | ##### |
| Mrp153    | 8.34E-03 | 1.17E+01 | 6.09E-04 | 2.528726 | ##### |
| Myo16     | 3.38E-05 | 2.35E+01 | 1.28E-06 | 0.11408  | ##### |
| Ic11      | 2.85E-02 | 9.06E+00 | 2.61E-03 | -2.57753 | ##### |
| Retnlg    | 8.62E-04 | 1.66E+01 | 4.59E-05 | -0.54585 | ##### |
| Rpl38-ps3 | 2.61E-03 | 1.43E+01 | 1.59E-04 | 0.099783 | ##### |
| Tsc22d4   | 1.82E-04 | 1.99E+01 | 7.95E-06 | 1.30905  | ##### |
| AABR07009 | 4.82E-02 | 7.90E+00 | 4.95E-03 | -0.02748 | ##### |
| Acot1     | 4.36E-02 | 8.13E+00 | 4.36E-03 | 0.247563 | ##### |
| RGD156307 | 3.35E-02 | 8.71E+00 | 3.17E-03 | 1.180387 | ##### |
| Zfp3612   | 4.04E-02 | 8.30E+00 | 3.97E-03 | 3.834556 | ##### |
| Fbxw10    | 1.74E-10 | 4.87E+01 | 3.01E-12 | 2.982626 | ##### |
| Ano5      | 9.12E-30 | 1.39E+02 | 4.14E-32 | 4.169842 | ##### |
| Phka2     | 9.37E-06 | 2.61E+01 | 3.23E-07 | 1.070199 | ##### |
| Fam81a    | 3.39E-07 | 3.30E+01 | 9.18E-09 | 2.548962 | ##### |
| I127ra    | 1.02E-02 | 1.13E+01 | 7.81E-04 | 0.310238 | ##### |
| Gabrb2    | 2.05E-10 | 4.83E+01 | 3.60E-12 | 2.019837 | ##### |
| AABR07000 | 5.45E-04 | 1.76E+01 | 2.75E-05 | -1.9159  | ##### |
| AC115371  | 7.69E-04 | 1.69E+01 | 4.04E-05 | 0.712275 | ##### |
| Trpc5     | 4.16E-02 | 8.24E+00 | 4.11E-03 | -2.65675 | ##### |
| Rassf6    | 1.91E-02 | 9.93E+00 | 1.62E-03 | -0.69078 | ##### |
| AC130940  | 2.93E-04 | 1.89E+01 | 1.35E-05 | 0.253612 | ##### |
| Cyp2w1    | 4.76E-02 | 7.93E+00 | 4.86E-03 | -1.46345 | ##### |
| Rcor2     | 8.09E-03 | 1.18E+01 | 5.90E-04 | 2.698547 | ##### |
| AABR07002 | 2.80E-03 | 1.41E+01 | 1.72E-04 | -0.23693 | ##### |
| Clec4g    | 4.81E-02 | 7.90E+00 | 4.93E-03 | -2.07091 | ##### |
| AABR07016 | 3.18E-02 | 8.82E+00 | 2.98E-03 | -0.8261  | ##### |
| Gorasp2   | 3.72E-03 | 1.35E+01 | 2.39E-04 | 1.722847 | ##### |
| Hsp1b     | 7.42E-05 | 2.18E+01 | 3.01E-06 | 3.365697 | ##### |
| Gpr63     | 2.09E-06 | 2.92E+01 | 6.46E-08 | 2.115163 | ##### |
| Rn50_11_c | 4.47E-02 | 8.07E+00 | 4.49E-03 | -0.11039 | ##### |
| Ankra2    | 2.64E-02 | 9.23E+00 | 2.38E-03 | -0.53059 | ##### |
| RGD156457 | 1.05E-02 | 1.12E+01 | 8.00E-04 | -2.50602 | ##### |
| Nxpe2     | 5.15E-03 | 1.28E+01 | 3.48E-04 | -0.20586 | ##### |
| Klhl33    | 1.49E-22 | 1.05E+02 | 9.98E-25 | 3.556024 | ##### |
| Adrald    | 2.74E-17 | 8.08E+01 | 2.52E-19 | 2.353609 | ##### |
| Prkar1b   | 1.01E-02 | 1.13E+01 | 7.65E-04 | 0.615806 | ##### |
| Stc2      | 5.00E-18 | 8.42E+01 | 4.37E-20 | 4.012999 | ##### |
| Cfap52    | 2.19E-04 | 1.96E+01 | 9.78E-06 | 1.044312 | ##### |
| Fcer2     | 3.45E-14 | 6.61E+01 | 4.26E-16 | 3.276752 | ##### |
| Gad2      | 2.25E-02 | 9.58E+00 | 1.97E-03 | -2.57949 | ##### |
| Slc17a7   | 6.91E-03 | 1.22E+01 | 4.91E-04 | 0.685307 | ##### |
| Tnks2     | 5.38E-03 | 1.27E+01 | 3.68E-04 | 2.101412 | ##### |
| Pcdh15    | 2.59E-02 | 9.28E+00 | 2.32E-03 | -2.58124 | ##### |
| Ap1s3     | 3.64E-11 | 5.19E+01 | 5.82E-13 | 1.966125 | ##### |
| Coch      | 5.40E-10 | 4.63E+01 | 9.93E-12 | -0.60024 | ##### |
| RGD156482 | 7.33E-07 | 3.14E+01 | 2.09E-08 | -0.52549 | ##### |
| Ebna1bp2  | 4.39E-12 | 5.62E+01 | 6.44E-14 | 1.167289 | ##### |
| Mns1      | 3.71E-03 | 1.35E+01 | 2.38E-04 | 0.677293 | ##### |
| Frem2     | 2.05E-06 | 2.93E+01 | 6.34E-08 | 2.370553 | ##### |

|           |          |          |          |          |       |
|-----------|----------|----------|----------|----------|-------|
| Serpib7   | 4.39E-02 | 8.11E+00 | 4.40E-03 | -0.48349 | ##### |
| Fbxl18    | 2.69E-04 | 1.91E+01 | 1.23E-05 | 1.934301 | ##### |
| Kcnk2     | 2.19E-18 | 8.59E+01 | 1.87E-20 | 3.816358 | ##### |
| Pik3c2g   | 1.34E-06 | 3.02E+01 | 3.95E-08 | 1.59813  | ##### |
| Dlgap1    | 9.57E-05 | 2.13E+01 | 3.97E-06 | 1.878892 | ##### |
| LOC100910 | 2.70E-03 | 1.42E+01 | 1.64E-04 | 3.770561 | ##### |
| RGD156535 | 3.97E-08 | 3.75E+01 | 9.30E-10 | 1.857993 | ##### |
| Sema3a    | 1.43E-02 | 1.06E+01 | 1.15E-03 | 0.994903 | ##### |
| Cyp2e1    | 7.70E-32 | 1.49E+02 | 3.21E-34 | 3.809311 | ##### |
| Zmat4     | 1.43E-02 | 1.06E+01 | 1.15E-03 | -2.50551 | ##### |
| Ccdc158   | 9.64E-06 | 2.60E+01 | 3.33E-07 | 1.069628 | ##### |
| AABR07032 | 2.38E-02 | 9.45E+00 | 2.11E-03 | -2.57805 | ##### |
| RGD156314 | 3.04E-02 | 8.91E+00 | 2.83E-03 | -2.50703 | ##### |
| Sbk2      | 4.59E-02 | 8.01E+00 | 4.65E-03 | -0.01361 | ##### |
| Pak6      | 3.11E-14 | 6.63E+01 | 3.83E-16 | 3.9202   | ##### |
| Pitx2     | 2.89E-06 | 2.85E+01 | 9.16E-08 | -0.66091 | ##### |
| Sall1     | 7.27E-06 | 2.66E+01 | 2.46E-07 | 0.546798 | ##### |
| Slc26a3   | 1.53E-06 | 2.99E+01 | 4.57E-08 | 1.265162 | ##### |
| AABR07072 | 7.46E-03 | 1.20E+01 | 5.35E-04 | -0.67326 | ##### |
| Igf2bp2   | 2.18E-02 | 9.66E+00 | 1.88E-03 | -0.17146 | ##### |
| Slc4a1    | 1.47E-11 | 5.38E+01 | 2.24E-13 | 3.177939 | ##### |
| Unc79     | 1.51E-02 | 1.04E+01 | 1.23E-03 | -0.72164 | ##### |
| Cacng6    | 1.06E-06 | 3.06E+01 | 3.10E-08 | 2.429319 | ##### |
| Cetn3     | 2.69E-02 | 9.19E+00 | 2.43E-03 | 2.716501 | ##### |
| Ptp4a1    | 2.98E-02 | 8.96E+00 | 2.75E-03 | 0.791112 | ##### |
| Cxcl14    | 7.19E-06 | 2.67E+01 | 2.42E-07 | 1.36321  | ##### |
| Lrrc7     | 7.08E-03 | 1.21E+01 | 5.05E-04 | 0.374816 | ##### |
| Igf2bp3   | 6.95E-05 | 2.20E+01 | 2.79E-06 | 0.408101 | ##### |
| Bmx       | 1.80E-02 | 1.01E+01 | 1.51E-03 | 0.971923 | ##### |
| Illa      | 5.69E-03 | 1.26E+01 | 3.93E-04 | -1.38856 | ##### |
| Wwcl      | 3.78E-05 | 2.32E+01 | 1.44E-06 | 1.852062 | ##### |
| Brms1     | 4.83E-02 | 7.90E+00 | 4.95E-03 | 1.910923 | ##### |
| LOC100911 | 2.99E-02 | 8.95E+00 | 2.77E-03 | 0.332265 | ##### |
| Vwa2      | 2.81E-03 | 1.41E+01 | 1.73E-04 | 1.484241 | ##### |
| Igf2      | 1.58E-47 | 2.22E+02 | 4.15E-50 | 5.195454 | ##### |
| MGC94199  | 8.93E-03 | 1.16E+01 | 6.64E-04 | -0.22642 | ##### |
| Scn10a    | 2.15E-02 | 9.68E+00 | 1.86E-03 | -2.58051 | ##### |
| LOC100359 | 3.06E-03 | 1.39E+01 | 1.91E-04 | -1.29273 | ##### |
| Siglech   | 2.72E-02 | 9.16E+00 | 2.47E-03 | -2.12877 | ##### |
| LOC100912 | 1.31E-03 | 1.57E+01 | 7.27E-05 | 0.201348 | ##### |
| A930018M2 | 3.05E-08 | 3.80E+01 | 7.01E-10 | 2.35917  | ##### |
| Apln      | 1.77E-14 | 6.75E+01 | 2.15E-16 | 3.760816 | ##### |
| Abhd10    | 2.95E-17 | 8.06E+01 | 2.74E-19 | 2.117577 | ##### |
| Rpusd2    | 3.95E-02 | 8.35E+00 | 3.86E-03 | 0.933033 | ##### |
| Agr2      | 5.48E-06 | 2.72E+01 | 1.81E-07 | -0.83605 | ##### |
| Plin1     | 5.42E-03 | 1.27E+01 | 3.71E-04 | 0.785107 | ##### |
| Slc23a3   | 1.38E-02 | 1.07E+01 | 1.10E-03 | -1.53678 | ##### |
| Foxo6     | 2.72E-04 | 1.91E+01 | 1.24E-05 | 1.588097 | ##### |
