# Supplementary material for: Yixin‐Shu Capsules Ameliorated Ischemia‐Induced Heart Failure by Restoring Trx2 and Inhibiting JNK/p38 Activation
Source: Hindawi journal article supplement (doi:10.1155/2021/8049079), 2021-01-01
Supplement: f1 [file 8049079.f1.zip]

HF+YXS-H vs HF

| Gene      | FDR      | LR       | PValue   | logCPM   | logFC    |
|-----------|----------|----------|----------|----------|----------|
| Mmp9      | 5.38E-05 | 2.23E+01 | 2.36E-06 | 2.192278 | 1.02E+00 |
| Ovch2     | 2.13E-02 | 9.65E+00 | 1.90E-03 | -1.87457 | 2.42E+00 |
| Gpr63     | 1.23E-05 | 2.53E+01 | 4.81E-07 | 2.076417 | 1.14E+00 |
| Eya2      | 3.51E-22 | 1.03E+02 | 3.04E-24 | 4.22937  | 1.02E+00 |
| AABR07042 | 3.47E-05 | 2.32E+01 | 1.46E-06 | 0.457461 | 1.67E+00 |
| Angptl4   | 1.96E-26 | 1.23E+02 | 1.39E-28 | 2.806553 | 1.79E+00 |
| Grid1     | 1.03E-04 | 2.09E+01 | 4.82E-06 | 0.550321 | 1.56E+00 |
| Rn50_2_22 | 1.27E-02 | 1.08E+01 | 1.04E-03 | -1.47713 | 3.65E+00 |
| Zfp3612   | 3.81E-02 | 8.38E+00 | 3.78E-03 | 4.045232 | 2.04E+00 |
| Amer2     | 5.36E-03 | 1.26E+01 | 3.87E-04 | -2.43923 | 4.72E+00 |
| RGD156457 | 2.09E-02 | 9.69E+00 | 1.86E-03 | -2.58662 | 4.37E+00 |
| Tmco3     | 7.32E-03 | 1.19E+01 | 5.47E-04 | 1.082635 | 1.81E+00 |
| Myo16     | 2.68E-03 | 1.41E+01 | 1.77E-04 | -0.13726 | 1.52E+00 |
| Ghrhr     | 1.90E-02 | 9.89E+00 | 1.66E-03 | -0.56471 | 1.51E+00 |
| LOC102554 | 2.23E-03 | 1.45E+01 | 1.44E-04 | 0.532287 | 3.75E+00 |
| AABR07072 | 1.46E-02 | 1.05E+01 | 1.22E-03 | -0.68439 | 1.67E+00 |
| Cetn3     | 3.44E-02 | 8.61E+00 | 3.34E-03 | 2.430605 | 1.67E+00 |
| Rn50_11_0 | 2.51E-14 | 6.64E+01 | 3.61E-16 | 0.828851 | 2.83E+00 |
| RGD156414 | 1.40E-02 | 1.06E+01 | 1.16E-03 | -1.09463 | 1.95E+00 |
| Ebna1bp2  | 4.87E-02 | 7.84E+00 | 5.11E-03 | 0.534847 | 1.58E+00 |
| Ano5      | 1.47E-71 | 3.33E+02 | 2.18E-74 | 4.456854 | 1.72E+00 |
| LOC691153 | 2.46E-09 | 4.29E+01 | 5.74E-11 | 2.553212 | 1.18E+00 |
| LOC103690 | 2.11E-02 | 9.66E+00 | 1.88E-03 | 0.554769 | 2.64E+00 |
| Gal       | 5.83E-10 | 4.59E+01 | 1.27E-11 | 0.817906 | 2.39E+00 |
| Irs2      | #####    | 1.20E+03 | #####    | 6.62145  | 1.52E+00 |
| Hspa1b    | 9.87E-47 | 2.18E+02 | 2.77E-49 | 4.801752 | 3.24E+00 |
| Garem2    | 8.02E-03 | 1.18E+01 | 6.08E-04 | 0.518515 | 1.10E+00 |
| Kcnq3     | 8.41E-03 | 1.17E+01 | 6.41E-04 | -2.18655 | 3.30E+00 |
| Dusp15    | 4.86E-21 | 9.79E+01 | 4.49E-23 | 4.109262 | 1.09E+00 |
| Sp7       | 5.17E-03 | 1.27E+01 | 3.72E-04 | -1.06888 | 1.97E+00 |
| RGD156488 | 2.21E-02 | 9.56E+00 | 1.99E-03 | 1.608357 | 1.05E+00 |
| Hspala    | 1.27E-02 | 1.08E+01 | 1.03E-03 | 0.539227 | 1.85E+00 |
| Atplb4    | 2.55E-02 | 9.26E+00 | 2.34E-03 | -0.35099 | 1.43E+00 |
| Smc1      | 1.43E-04 | 2.02E+01 | 6.88E-06 | -1.06817 | 2.66E+00 |
| Esrp2     | 9.28E-03 | 1.14E+01 | 7.18E-04 | -1.50694 | 2.27E+00 |
| Ogn       | 8.06E-04 | 1.66E+01 | 4.60E-05 | 1.956805 | 1.96E+00 |
| Notch4    | 3.80E-96 | 4.47E+02 | 3.17E-99 | 6.47428  | 1.06E+00 |
| Fam222a   | 3.53E-11 | 5.16E+01 | 6.74E-13 | 0.956992 | 2.22E+00 |
| Sbk3      | 4.47E-11 | 5.11E+01 | 8.57E-13 | 0.549231 | 2.41E+00 |
| Noslap    | 6.32E-06 | 2.67E+01 | 2.33E-07 | 2.303522 | 1.01E+00 |
| Tshb      | 9.54E-03 | 1.14E+01 | 7.40E-04 | -1.83085 | 3.07E+00 |
| Mybph1    | 1.39E-13 | 6.30E+01 | 2.10E-15 | 1.722709 | 1.91E+00 |
| AABR07064 | #####    | 4.75E+02 | #####    | 5.637497 | 1.24E+00 |
| Unc80     | 4.95E-03 | 1.28E+01 | 3.53E-04 | -2.13052 | 3.41E+00 |
| Myl4      | 8.81E-43 | 1.99E+02 | 2.96E-45 | 5.134262 | 1.01E+00 |
| Rpusd2    | 2.84E-02 | 9.02E+00 | 2.66E-03 | 1.224101 | 2.47E+00 |
| Nr4a3     | 4.41E-94 | 4.37E+02 | 3.95E-97 | 3.598317 | 3.07E+00 |
| Slc4a1    | 1.04E-38 | 1.80E+02 | 4.16E-41 | 3.700769 | 1.76E+00 |
| Ccdc142   | 1.93E-06 | 2.92E+01 | 6.56E-08 | 0.642422 | 2.25E+00 |
| Col9a2    | 2.21E-05 | 2.41E+01 | 9.00E-07 | 1.370666 | 1.29E+00 |
| RGD156307 | 1.46E-04 | 2.02E+01 | 7.03E-06 | 1.719356 | 2.63E+00 |
| Fermt1    | 1.55E-02 | 1.03E+01 | 1.30E-03 | -2.58687 | 4.37E+00 |

|           |          |          |          |          |          |
|-----------|----------|----------|----------|----------|----------|
| Siglech   | 7.99E-03 | 1.18E+01 | 6.05E-04 | -2.18868 | 3.30E+00 |
| Natd1     | 1.13E-02 | 1.10E+01 | 9.04E-04 | 0.048577 | 3.06E+00 |
| Slc8a3    | 4.96E-02 | 7.80E+00 | 5.21E-03 | -0.48714 | 1.30E+00 |
| Ptp4a1    | 6.28E-03 | 1.23E+01 | 4.62E-04 | 0.902683 | 2.00E+00 |
| Pcdh9     | 4.18E-02 | 8.17E+00 | 4.25E-03 | -1.70122 | 1.91E+00 |
| Myl7      | 0.00E+00 | 2.10E+03 | 0.00E+00 | 6.621567 | 2.39E+00 |
| Ccnj      | 3.77E-02 | 8.41E+00 | 3.74E-03 | -1.86583 | 3.89E+00 |
| Hs3st3b1  | 8.80E-05 | 2.12E+01 | 4.05E-06 | 0.045185 | 1.80E+00 |
| Noct      | 1.31E-24 | 1.14E+02 | 1.02E-26 | 4.075286 | 1.18E+00 |
| Ajap1     | 4.01E-03 | 1.32E+01 | 2.78E-04 | 0.523289 | 1.21E+00 |
| LOC100912 | 2.50E-02 | 9.30E+00 | 2.29E-03 | -1.51884 | 4.32E+00 |
| Col9a1    | 3.04E-05 | 2.35E+01 | 1.27E-06 | 0.913114 | 1.49E+00 |
| Mrp153    | 1.05E-02 | 1.12E+01 | 8.24E-04 | 2.242397 | 2.14E+00 |
| Coll10a1  | 5.67E-13 | 6.01E+01 | 9.08E-15 | 2.555668 | 1.40E+00 |
| Sbk2      | 3.09E-08 | 3.77E+01 | 8.20E-10 | 0.627803 | 1.99E+00 |
| LOC103694 | 1.14E-05 | 2.55E+01 | 4.42E-07 | 6.985856 | 1.52E+00 |
| Mybpc1    | 9.29E-04 | 1.63E+01 | 5.38E-05 | -1.09854 | 2.37E+00 |
| Kcnhl     | 1.08E-02 | 1.11E+01 | 8.54E-04 | -1.50929 | 2.27E+00 |
| Rmt1      | 3.66E-02 | 8.48E+00 | 3.60E-03 | -2.02639 | 2.74E+00 |
| LOC100912 | 6.32E-03 | 1.23E+01 | 4.65E-04 | 0.351918 | 3.05E+00 |
| Scn10a    | 2.04E-02 | 9.74E+00 | 1.81E-03 | -2.58712 | 4.37E+00 |
| Ucp3      | 2.01E-41 | 1.93E+02 | 7.12E-44 | 3.242398 | 1.91E+00 |
| Dyrk3     | 3.78E-08 | 3.73E+01 | 1.01E-09 | 1.980922 | 1.38E+00 |
| Hif3a     | 1.51E-04 | 2.01E+01 | 7.33E-06 | 1.076322 | 1.24E+00 |
| Pik3c2g   | 1.45E-06 | 2.98E+01 | 4.85E-08 | 1.562687 | 1.38E+00 |
| Fam134b   | 1.88E-02 | 9.91E+00 | 1.64E-03 | 1.880821 | 2.14E+00 |
| Syt12     | 1.53E-02 | 1.04E+01 | 1.28E-03 | -0.01203 | 3.87E+00 |
| Abhd10    | 3.75E-02 | 8.42E+00 | 3.72E-03 | 0.833521 | 4.07E+00 |
| LOC100910 | 4.86E-03 | 1.28E+01 | 3.45E-04 | 3.885267 | 2.82E+00 |
| Reg3b     | 5.91E-03 | 1.24E+01 | 4.31E-04 | 0.56211  | 1.21E+00 |
| Ntsr1     | 6.70E-06 | 2.66E+01 | 2.49E-07 | 1.144269 | 1.48E+00 |
| Csdc2     | 1.42E-40 | 1.89E+02 | 5.23E-43 | 4.60143  | 1.13E+00 |
| Adra2c    | 3.95E-03 | 1.32E+01 | 2.74E-04 | 0.262476 | 1.36E+00 |
| Cadm2     | 4.32E-02 | 8.10E+00 | 4.43E-03 | 0.098403 | 1.04E+00 |
| LOC100302 | 4.43E-02 | 8.05E+00 | 4.56E-03 | -0.32075 | 1.16E+00 |
| Lvrn      | 4.28E-02 | 8.12E+00 | 4.37E-03 | 0.382388 | 1.07E+00 |
| Sh2d4b    | 1.67E-02 | 1.02E+01 | 1.43E-03 | -1.87678 | 2.42E+00 |
| LOC103690 | 1.22E-02 | 1.08E+01 | 9.90E-04 | 0.884655 | 1.21E+00 |
| Vwa5a     | 1.10E-02 | 1.11E+01 | 8.73E-04 | -0.67594 | 2.08E+00 |
| Srrm3     | 3.09E-02 | 8.84E+00 | 2.94E-03 | 0.059983 | 1.16E+00 |
| Gria2     | 4.24E-02 | 8.15E+00 | 4.32E-03 | -0.45519 | 1.40E+00 |
| Abat      | 4.65E-03 | 1.29E+01 | 3.28E-04 | -0.31728 | 1.42E+00 |
| Sln       | 2.40E-75 | 3.51E+02 | 3.26E-78 | 4.336414 | 2.14E+00 |
| Dr1       | 6.75E-05 | 2.18E+01 | 3.02E-06 | 2.526851 | 2.97E+00 |
| Magea11   | 1.18E-03 | 1.58E+01 | 7.03E-05 | -1.43202 | 2.73E+00 |
| Ncbp2     | 7.53E-03 | 1.19E+01 | 5.66E-04 | 1.9671   | 1.79E+00 |
| Brms1     | 6.71E-04 | 1.70E+01 | 3.74E-05 | 1.753127 | 1.67E+00 |
| Slc17a7   | 6.20E-03 | 1.23E+01 | 4.54E-04 | 0.659163 | 1.06E+00 |
| Klhl34    | 4.96E-05 | 2.25E+01 | 2.15E-06 | 1.798023 | 1.06E+00 |
| Adcy1     | 9.47E-15 | 6.85E+01 | 1.30E-16 | 3.173317 | 1.18E+00 |
| RGD156366 | 2.98E-02 | 8.92E+00 | 2.82E-03 | -2.66467 | 4.16E+00 |
| Col2a1    | #####    | 8.71E+02 | #####    | 6.157645 | 1.41E+00 |
| LOC100911 | 4.34E-02 | 8.09E+00 | 4.45E-03 | -0.35544 | 2.12E+00 |
| Mgarp     | 4.85E-02 | 7.85E+00 | 5.08E-03 | -0.8449  | 1.51E+00 |

|           |          |          |          |          |          |
|-----------|----------|----------|----------|----------|----------|
| Bmp10     | 7.94E-20 | 9.21E+01 | 8.23E-22 | 0.937077 | 3.57E+00 |
| RGD156079 | 2.03E-02 | 9.75E+00 | 1.79E-03 | 3.731454 | 1.65E+00 |
| LOC690126 | 3.46E-02 | 8.60E+00 | 3.36E-03 | -1.87802 | 2.42E+00 |
| RGD130910 | 2.24E-03 | 1.44E+01 | 1.45E-04 | -2.3061  | 5.01E+00 |
| Pdk4      | 0.00E+00 | 2.98E+03 | 0.00E+00 | 7.712467 | 2.16E+00 |
| Mapk7     | 5.22E-03 | 1.27E+01 | 3.76E-04 | -1.98098 | 5.54E+00 |
| LOC100910 | 2.02E-03 | 1.47E+01 | 1.28E-04 | 3.79529  | 1.94E+00 |
| LOC100910 | 2.86E-02 | 9.01E+00 | 2.69E-03 | -0.25846 | #####    |
| LOC100911 | 7.83E-03 | 1.18E+01 | 5.91E-04 | 0.533742 | #####    |
| Ntrk3     | 1.95E-04 | 1.96E+01 | 9.74E-06 | 0.905337 | #####    |
| RT1-CE3   | 9.36E-04 | 1.63E+01 | 5.42E-05 | 1.42356  | #####    |
| C4a       | 1.41E-70 | 3.28E+02 | 2.18E-73 | 5.658235 | #####    |
| Ccl12     | 5.77E-03 | 1.24E+01 | 4.19E-04 | -0.25235 | #####    |
| LOC100361 | 4.03E-02 | 8.27E+00 | 4.04E-03 | -2.59278 | #####    |
| RGD156184 | 8.07E-05 | 2.14E+01 | 3.68E-06 | 0.893095 | #####    |
| Fcar      | 3.70E-03 | 1.34E+01 | 2.54E-04 | -2.32293 | #####    |
| LOC100910 | 3.88E-03 | 1.33E+01 | 2.68E-04 | -0.80311 | #####    |
| Rn50_5_08 | 1.61E-02 | 1.02E+01 | 1.37E-03 | -2.52122 | #####    |
| LOC103694 | 2.57E-02 | 9.24E+00 | 2.36E-03 | -1.43176 | #####    |
| Clec2d    | 9.32E-08 | 3.55E+01 | 2.61E-09 | -0.18857 | #####    |
| Pabpc41   | 1.44E-02 | 1.05E+01 | 1.20E-03 | -1.93748 | #####    |
| Prima1    | 1.43E-05 | 2.50E+01 | 5.63E-07 | 1.867655 | #####    |
| Esm1      | 5.63E-08 | 3.65E+01 | 1.54E-09 | 1.556524 | #####    |
| AABR07000 | 5.93E-03 | 1.24E+01 | 4.32E-04 | 1.425097 | #####    |
| Sncg      | 3.26E-17 | 8.00E+01 | 3.80E-19 | 3.180462 | #####    |
| Mcoln2    | 1.37E-02 | 1.06E+01 | 1.13E-03 | 0.055804 | #####    |
| AABR07034 | 3.44E-05 | 2.32E+01 | 1.45E-06 | -0.86394 | #####    |
| Illrn     | 6.95E-04 | 1.69E+01 | 3.90E-05 | 0.73665  | #####    |
| Arr3      | 1.85E-02 | 9.95E+00 | 1.60E-03 | 0.316814 | #####    |
| Dpep3     | 2.58E-02 | 9.23E+00 | 2.38E-03 | -0.17055 | #####    |
| Msln      | 2.51E-03 | 1.42E+01 | 1.65E-04 | 0.385244 | #####    |
| Polr2i    | 6.89E-04 | 1.69E+01 | 3.86E-05 | 2.004538 | #####    |
| LOC257642 | 1.94E-02 | 9.85E+00 | 1.70E-03 | -2.52177 | #####    |
| Zfp136    | 4.02E-02 | 8.27E+00 | 4.03E-03 | 0.095308 | #####    |
| Adh7      | 8.78E-05 | 2.12E+01 | 4.04E-06 | 1.233108 | #####    |
| C1qtnf3   | 7.97E-04 | 1.66E+01 | 4.54E-05 | 0.595605 | #####    |
| AABR07051 | 3.56E-02 | 8.54E+00 | 3.48E-03 | -2.52012 | #####    |
| Taslr3    | 3.51E-02 | 8.57E+00 | 3.42E-03 | -0.54792 | #####    |
| Dsc3      | 2.29E-02 | 9.49E+00 | 2.07E-03 | -1.93774 | #####    |
| AABR07051 | 9.01E-03 | 1.15E+01 | 6.92E-04 | -2.32401 | #####    |
| Ptges     | 4.15E-02 | 8.19E+00 | 4.21E-03 | -1.6751  | #####    |
| C1qtnf5   | 1.35E-22 | 1.05E+02 | 1.13E-24 | 4.321953 | #####    |
| Ccl26     | 3.81E-02 | 8.38E+00 | 3.79E-03 | -2.51516 | #####    |
| Ighg      | 9.77E-03 | 1.13E+01 | 7.61E-04 | -2.0928  | #####    |
| Fuom      | 2.35E-02 | 9.43E+00 | 2.13E-03 | 1.123098 | #####    |
| Sfrp4     | 2.34E-04 | 1.92E+01 | 1.19E-05 | 0.732358 | #####    |
| Cgref1    | 3.24E-06 | 2.81E+01 | 1.14E-07 | 1.29652  | #####    |
| Lingol    | 8.52E-03 | 1.16E+01 | 6.49E-04 | 0.849748 | #####    |
| Ppia14d   | 3.39E-02 | 8.64E+00 | 3.28E-03 | 3.911851 | #####    |
| Cnr1      | 3.54E-02 | 8.55E+00 | 3.46E-03 | -1.09465 | #####    |
| Ighv8-4   | 2.56E-05 | 2.38E+01 | 1.05E-06 | -1.8456  | #####    |
| Chi311    | 6.85E-27 | 1.25E+02 | 4.78E-29 | 4.061427 | #####    |
| Ppp2r2b   | 3.03E-03 | 1.38E+01 | 2.04E-04 | 0.098638 | #####    |
| AABR07051 | 1.12E-03 | 1.59E+01 | 6.64E-05 | -1.89881 | #####    |

|           |          |          |          |          |       |
|-----------|----------|----------|----------|----------|-------|
| RGD130492 | 2.60E-03 | 1.41E+01 | 1.71E-04 | 0.874647 | ##### |
| AABR07065 | 2.91E-03 | 1.39E+01 | 1.95E-04 | -2.20195 | ##### |
| AABR07051 | 3.03E-03 | 1.38E+01 | 2.04E-04 | -2.31863 | ##### |
| Gsta2     | 3.16E-04 | 1.86E+01 | 1.65E-05 | -0.14867 | ##### |
| Slc7a3    | 1.05E-02 | 1.12E+01 | 8.21E-04 | -2.45051 | ##### |
| Ighv1-47  | 2.40E-05 | 2.40E+01 | 9.86E-07 | -1.84914 | ##### |
| Fam3b     | 2.89E-03 | 1.39E+01 | 1.93E-04 | -0.45901 | ##### |
| Polr2l    | 7.52E-04 | 1.68E+01 | 4.26E-05 | 1.428876 | ##### |
| Myh3      | 9.24E-03 | 1.15E+01 | 7.14E-04 | -0.62297 | ##### |
| Csf3r     | 1.27E-03 | 1.56E+01 | 7.64E-05 | 1.193464 | ##### |
| AABR07037 | 1.31E-02 | 1.07E+01 | 1.07E-03 | 0.555764 | ##### |
| Rack1     | 9.73E-06 | 2.58E+01 | 3.74E-07 | -1.12962 | ##### |
| Ms4a7     | 2.98E-04 | 1.87E+01 | 1.54E-05 | 0.64172  | ##### |
| Syt15     | 1.16E-03 | 1.58E+01 | 6.87E-05 | -0.65951 | ##### |
| Fam169b   | 4.49E-02 | 8.02E+00 | 4.63E-03 | -0.05915 | ##### |
| Krt8      | 4.83E-02 | 7.86E+00 | 5.06E-03 | -0.18922 | ##### |
| LOC291276 | 1.77E-02 | 1.00E+01 | 1.53E-03 | -2.51902 | ##### |
| Adipoq    | 9.49E-04 | 1.63E+01 | 5.51E-05 | 0.30691  | ##### |
| Cyp4f37   | 2.03E-03 | 1.47E+01 | 1.29E-04 | 0.464635 | ##### |
| P4ha3     | 3.51E-03 | 1.35E+01 | 2.39E-04 | -1.42297 | ##### |
| LOC103690 | 1.39E-02 | 1.06E+01 | 1.15E-03 | -1.65887 | ##### |
| Ly6g6e    | 4.03E-02 | 8.26E+00 | 4.05E-03 | -0.94838 | ##### |
| Il10      | 3.55E-02 | 8.54E+00 | 3.47E-03 | -2.38849 | ##### |
| Klkb1     | 3.79E-04 | 1.82E+01 | 2.00E-05 | 0.012802 | ##### |
| Pcdhb21   | 1.80E-02 | 1.00E+01 | 1.56E-03 | 0.170557 | ##### |
| C3        | 2.35E-07 | 3.36E+01 | 6.94E-09 | 2.396528 | ##### |
| Sbsn      | 1.03E-17 | 8.23E+01 | 1.16E-19 | 2.788517 | ##### |
| Fbln7     | 1.75E-05 | 2.46E+01 | 7.03E-07 | 1.126618 | ##### |
| Foxl1     | 4.96E-02 | 7.80E+00 | 5.22E-03 | -2.52507 | ##### |
| Six2      | 7.47E-03 | 1.19E+01 | 5.61E-04 | -0.25029 | ##### |
| Fam180a   | 2.19E-05 | 2.41E+01 | 8.94E-07 | 1.859561 | ##### |
| Cdkn2b    | 8.78E-03 | 1.16E+01 | 6.72E-04 | -0.22931 | ##### |
| RT1-N2    | 5.88E-25 | 1.16E+02 | 4.49E-27 | 4.124251 | ##### |
| Serpinf1  | #####    | 4.78E+02 | #####    | 6.574195 | ##### |
| Ccl7      | 9.81E-05 | 2.10E+01 | 4.56E-06 | 1.216084 | ##### |
| LOC100911 | 4.43E-03 | 1.30E+01 | 3.11E-04 | -0.38008 | ##### |
| Pcgf1     | 6.07E-09 | 4.11E+01 | 1.48E-10 | 0.089303 | ##### |
| LOC688459 | 4.28E-02 | 8.13E+00 | 4.37E-03 | -2.59666 | ##### |
| Cd7       | 1.14E-02 | 1.10E+01 | 9.15E-04 | 0.905952 | ##### |
| Igsf10    | 6.21E-46 | 2.14E+02 | 1.82E-48 | 4.862746 | ##### |
| Tceal5    | 9.08E-05 | 2.12E+01 | 4.20E-06 | 1.175828 | ##### |
| Brms1l    | 5.02E-03 | 1.27E+01 | 3.59E-04 | 1.66636  | ##### |
| Car3      | 5.14E-05 | 2.24E+01 | 2.24E-06 | 2.016857 | ##### |
| LOC691828 | 3.26E-02 | 8.72E+00 | 3.14E-03 | -2.59223 | ##### |
| Adcy2     | 3.77E-02 | 8.41E+00 | 3.73E-03 | 0.524802 | ##### |
| Zfp383    | 3.57E-02 | 8.53E+00 | 3.49E-03 | -1.30704 | ##### |
| AABR07046 | 3.32E-45 | 2.11E+02 | 9.95E-48 | 5.310033 | ##### |
| Cd163l1   | 2.71E-02 | 9.13E+00 | 2.52E-03 | -0.02587 | ##### |
| Clec11a   | 3.56E-20 | 9.37E+01 | 3.62E-22 | 4.235137 | ##### |
| Il17re    | 1.35E-06 | 2.99E+01 | 4.46E-08 | 0.461992 | ##### |
| Ccdc3     | 2.64E-04 | 1.89E+01 | 1.35E-05 | 0.840898 | ##### |
| RT1-CE6   | 4.37E-02 | 8.07E+00 | 4.49E-03 | -1.84468 | ##### |
| Col8a2    | 2.29E-17 | 8.07E+01 | 2.64E-19 | 4.039962 | ##### |
| LOC100910 | 3.11E-02 | 8.82E+00 | 2.97E-03 | 0.414606 | ##### |

|           |          |          |          |          |       |
|-----------|----------|----------|----------|----------|-------|
| Apopt1    | 1.73E-04 | 1.98E+01 | 8.50E-06 | 1.950734 | ##### |
| LOC103690 | 1.06E-03 | 1.60E+01 | 6.24E-05 | 3.547534 | ##### |
| AC103179. | 1.18E-03 | 1.58E+01 | 7.00E-05 | 0.623753 | ##### |
| Slc27a6   | 2.40E-02 | 9.38E+00 | 2.20E-03 | -0.65125 | ##### |
| Grem1     | 2.07E-03 | 1.46E+01 | 1.32E-04 | -0.28078 | ##### |
| Rhbg      | 1.77E-02 | 1.00E+01 | 1.53E-03 | -2.51902 | ##### |
| Scube3    | 7.26E-07 | 3.12E+01 | 2.32E-08 | 1.173505 | ##### |
| Zfp39     | 1.95E-03 | 1.47E+01 | 1.23E-04 | 1.148055 | ##### |
| Pex5      | 1.64E-02 | 1.02E+01 | 1.40E-03 | -0.9378  | ##### |
| Ptx3      | 1.45E-03 | 1.54E+01 | 8.84E-05 | -0.16952 | ##### |
| Cd180     | 2.68E-03 | 1.41E+01 | 1.77E-04 | 0.974778 | ##### |
| Cxcl13    | 1.03E-07 | 3.52E+01 | 2.91E-09 | 2.026777 | ##### |
| Oas1i     | 5.24E-04 | 1.75E+01 | 2.85E-05 | 1.125105 | ##### |
| Cxcl1     | 1.36E-03 | 1.55E+01 | 8.26E-05 | 1.267469 | ##### |
| LOC102553 | 8.12E-07 | 3.10E+01 | 2.61E-08 | 1.705363 | ##### |
| Trh       | 7.21E-11 | 5.02E+01 | 1.41E-12 | 2.177009 | ##### |
| LOC100360 | 7.97E-04 | 1.66E+01 | 4.54E-05 | 1.647026 | ##### |
| Dsg3      | 4.49E-02 | 8.02E+00 | 4.63E-03 | -1.71575 | ##### |
| LOC100910 | 8.06E-04 | 1.66E+01 | 4.60E-05 | 2.283385 | ##### |
| Uchl1     | 1.34E-07 | 3.47E+01 | 3.84E-09 | 1.479039 | ##### |
| Testin    | 1.93E-02 | 9.86E+00 | 1.69E-03 | -0.4602  | ##### |
| Ccnal     | 3.01E-02 | 8.89E+00 | 2.86E-03 | -2.44449 | ##### |
| Actg2     | 2.56E-32 | 1.50E+02 | 1.37E-34 | 3.432206 | ##### |
| C4b       | 8.01E-90 | 4.18E+02 | 7.66E-93 | 5.883861 | ##### |
| Espn      | 4.25E-02 | 8.14E+00 | 4.33E-03 | -1.52937 | ##### |
| Fkbp1b    | 3.20E-02 | 8.76E+00 | 3.07E-03 | -1.49106 | ##### |
| Adra2a    | 8.64E-03 | 1.16E+01 | 6.60E-04 | -0.60271 | ##### |
| Ngp       | 3.27E-02 | 8.72E+00 | 3.15E-03 | -2.37927 | ##### |
| Cacna2d4  | 3.80E-02 | 8.39E+00 | 3.77E-03 | -2.51571 | ##### |
| Pcdhb3    | 1.42E-02 | 1.05E+01 | 1.18E-03 | 0.262937 | ##### |
| Cnn1      | 3.54E-18 | 8.45E+01 | 3.90E-20 | 2.930552 | ##### |
| Ighm      | 5.68E-21 | 9.75E+01 | 5.33E-23 | 3.758549 | ##### |
| Tcea17    | 1.03E-30 | 1.43E+02 | 5.96E-33 | 4.367601 | ##### |
| AABR07066 | 1.47E-02 | 1.04E+01 | 1.23E-03 | 0.018298 | ##### |
| Plac8     | 7.33E-03 | 1.19E+01 | 5.48E-04 | 1.980862 | ##### |
| Ankrd23   | #####    | 4.86E+02 | #####    | 6.138714 | ##### |
| Islr      | #####    | 4.94E+02 | #####    | 5.636712 | ##### |
| Figf      | 1.93E-14 | 6.70E+01 | 2.74E-16 | 3.583276 | ##### |
| Scd       | 3.06E-02 | 8.86E+00 | 2.91E-03 | 0.047712 | ##### |
| AABR07011 | 4.41E-09 | 4.17E+01 | 1.06E-10 | 4.190444 | ##### |
| Egr2      | 9.53E-13 | 5.90E+01 | 1.56E-14 | 2.55459  | ##### |
| Grin3a    | 1.07E-02 | 1.11E+01 | 8.41E-04 | -1.98081 | ##### |
| Tpcr12    | 1.15E-02 | 1.10E+01 | 9.22E-04 | -2.44941 | ##### |
| Fam50a    | 4.39E-02 | 8.06E+00 | 4.51E-03 | 0.474508 | ##### |
| Cilp      | 7.56E-53 | 2.46E+02 | 1.75E-55 | 4.526486 | ##### |
| Pmfbp1    | 2.59E-03 | 1.41E+01 | 1.70E-04 | -0.76221 | ##### |
| AABR07065 | 1.49E-06 | 2.97E+01 | 4.99E-08 | -1.60506 | ##### |
| Tcf23     | 2.63E-02 | 9.19E+00 | 2.44E-03 | -0.59983 | ##### |
| Tlr2      | 3.05E-06 | 2.83E+01 | 1.06E-07 | 2.0871   | ##### |
| Polq      | 1.58E-02 | 1.03E+01 | 1.34E-03 | 0.061733 | ##### |
| Tcte3     | 3.76E-02 | 8.41E+00 | 3.72E-03 | -1.84771 | ##### |
| Lox11     | 7.96E-84 | 3.90E+02 | 8.59E-87 | 5.781265 | ##### |
| Chod1     | 1.91E-04 | 1.96E+01 | 9.46E-06 | 0.568838 | ##### |
| LOC100361 | 5.18E-08 | 3.67E+01 | 1.41E-09 | 0.609629 | ##### |

|           |          |          |          |          |       |
|-----------|----------|----------|----------|----------|-------|
| LOC103693 | 4.45E-03 | 1.30E+01 | 3.12E-04 | -0.05007 | ##### |
| AABR07053 | 2.41E-02 | 9.37E+00 | 2.20E-03 | -2.09023 | ##### |
| LOC299282 | 5.42E-22 | 1.02E+02 | 4.76E-24 | 1.978569 | ##### |
| Prrx2     | 2.56E-04 | 1.90E+01 | 1.31E-05 | 1.526319 | ##### |
| Dram1     | 5.96E-07 | 3.16E+01 | 1.87E-08 | 2.316425 | ##### |
| Osr1      | 3.73E-13 | 6.09E+01 | 5.87E-15 | 2.496635 | ##### |
| Bcas1     | 1.56E-02 | 1.03E+01 | 1.32E-03 | -1.89143 | ##### |
| Grhl3     | 3.14E-04 | 1.86E+01 | 1.63E-05 | -0.87214 | ##### |
| Il21r     | 2.17E-02 | 9.60E+00 | 1.94E-03 | 0.8693   | ##### |
| MGC105649 | 1.13E-06 | 3.03E+01 | 3.72E-08 | 2.478988 | ##### |
| Fcnb      | 2.29E-09 | 4.31E+01 | 5.31E-11 | 0.571687 | ##### |
| S100a9    | 1.66E-05 | 2.47E+01 | 6.65E-07 | 1.364483 | ##### |
| AABR07065 | 3.26E-02 | 8.72E+00 | 3.14E-03 | -1.83721 | ##### |
| AABR07051 | 5.65E-05 | 2.22E+01 | 2.48E-06 | -1.80188 | ##### |
| Lrrc17    | 1.41E-09 | 4.41E+01 | 3.18E-11 | 2.402857 | ##### |
| Slc27a2   | 3.98E-02 | 8.29E+00 | 3.98E-03 | 0.012141 | ##### |
| Cpxm2     | 9.14E-15 | 6.85E+01 | 1.25E-16 | 3.776989 | ##### |
| Tpm2      | 2.31E-64 | 3.00E+02 | 3.78E-67 | 5.604167 | ##### |
| LOC100125 | 6.78E-03 | 1.21E+01 | 5.02E-04 | -1.76916 | ##### |
| AABR07051 | 1.81E-03 | 1.49E+01 | 1.13E-04 | -2.09653 | ##### |
| Mpz       | 2.58E-05 | 2.38E+01 | 1.07E-06 | 2.325172 | ##### |
| Ccl19     | 6.83E-05 | 2.18E+01 | 3.06E-06 | 2.106963 | ##### |
| RGD131174 | 8.97E-17 | 7.79E+01 | 1.07E-18 | 3.620736 | ##### |
| Ifit1     | #####    | 6.49E+02 | #####    | 4.110884 | ##### |
| Krt18     | 9.67E-08 | 3.54E+01 | 2.71E-09 | -0.53333 | ##### |
| Il1b      | 1.76E-04 | 1.98E+01 | 8.63E-06 | 1.452884 | ##### |
| Sectm1b   | 7.87E-03 | 1.18E+01 | 5.94E-04 | 0.000666 | ##### |
| Igfbp2    | 4.22E-05 | 2.28E+01 | 1.81E-06 | -1.79938 | ##### |
| Egr3      | 4.47E-08 | 3.70E+01 | 1.21E-09 | 2.40365  | ##### |
| Nlrp12    | 4.31E-04 | 1.79E+01 | 2.31E-05 | -1.21285 | ##### |
| Mff       | 1.57E-02 | 1.03E+01 | 1.33E-03 | 2.438716 | ##### |
| Rassf10   | 1.16E-03 | 1.58E+01 | 6.89E-05 | 0.87665  | ##### |
| Pappa2    | 1.47E-07 | 3.45E+01 | 4.23E-09 | 0.980609 | ##### |
| Wisp2     | #####    | 5.73E+02 | #####    | 5.261935 | ##### |
| P2ry12    | 2.69E-04 | 1.89E+01 | 1.38E-05 | 0.825723 | ##### |
| Nefl      | 1.26E-02 | 1.08E+01 | 1.03E-03 | -2.08842 | ##### |
| LOC102556 | 1.97E-06 | 2.91E+01 | 6.70E-08 | 3.162039 | ##### |
| Thbs4     | 5.28E-75 | 3.49E+02 | 7.33E-78 | 4.824104 | ##### |
| Igh-6     | 3.28E-11 | 5.18E+01 | 6.21E-13 | 2.312991 | ##### |
| Scg2      | 4.52E-02 | 8.00E+00 | 4.67E-03 | -1.84747 | ##### |
| Adamts17  | 3.58E-05 | 2.31E+01 | 1.51E-06 | 0.714912 | ##### |
| Map3k7    | 4.12E-02 | 8.21E+00 | 4.17E-03 | 1.58362  | ##### |
| RGD156166 | 3.86E-02 | 8.36E+00 | 3.84E-03 | -0.15278 | ##### |
| Islr2     | 8.28E-04 | 1.66E+01 | 4.73E-05 | 0.796819 | ##### |
| Endou     | 9.87E-05 | 2.10E+01 | 4.59E-06 | 1.370723 | ##### |
| Itga8     | 2.85E-13 | 6.15E+01 | 4.44E-15 | 3.18451  | ##### |
| Matn4     | 2.65E-05 | 2.38E+01 | 1.10E-06 | 2.002978 | ##### |
| Scn2a     | 1.08E-02 | 1.11E+01 | 8.60E-04 | 0.142418 | ##### |
| NEWGENE_6 | 9.53E-03 | 1.14E+01 | 7.39E-04 | 0.655765 | ##### |
| Rplp2     | 1.20E-02 | 1.09E+01 | 9.66E-04 | 4.055655 | ##### |
| Rasa1     | 1.59E-02 | 1.03E+01 | 1.35E-03 | -1.18876 | ##### |
| AABR07030 | 1.70E-02 | 1.01E+01 | 1.46E-03 | -1.49775 | ##### |
| Kcna6     | 3.68E-02 | 8.47E+00 | 3.62E-03 | -0.55853 | ##### |
| Ch25h     | 7.42E-06 | 2.64E+01 | 2.78E-07 | 1.128653 | ##### |

|           |          |          |          |          |       |
|-----------|----------|----------|----------|----------|-------|
| Selp      | 4.24E-04 | 1.80E+01 | 2.26E-05 | 0.342353 | ##### |
| Fibin     | 9.05E-32 | 1.48E+02 | 4.94E-34 | 4.580475 | ##### |
| LOC100909 | 1.82E-08 | 3.88E+01 | 4.67E-10 | 3.274685 | ##### |
| Myl1      | 2.73E-10 | 4.74E+01 | 5.72E-12 | 2.613781 | ##### |
| LOC100912 | 9.87E-83 | 3.85E+02 | 1.13E-85 | 5.165579 | ##### |
| Ltbp2     | #####    | 8.32E+02 | #####    | 6.597682 | ##### |
| AABR07051 | 4.96E-02 | 7.80E+00 | 5.22E-03 | -2.59    | ##### |
| Arnt12    | 4.49E-02 | 8.02E+00 | 4.64E-03 | -0.64311 | ##### |
| Ccl2      | 9.95E-08 | 3.53E+01 | 2.80E-09 | 2.192658 | ##### |
| Cst6      | 2.85E-02 | 9.01E+00 | 2.68E-03 | -1.76213 | ##### |
| AABR07060 | 5.07E-51 | 2.38E+02 | 1.25E-53 | 4.148926 | ##### |
