# Supplementary material for: Yixin‐Shu Capsules Ameliorated Ischemia‐Induced Heart Failure by Restoring Trx2 and Inhibiting JNK/p38 Activation
Source: Hindawi journal article supplement (doi:10.1155/2021/8049079), 2021-01-01
Supplement: f1 [file 8049079.f1.zip]

# HF+YXS-L vs HF

| gene      | FDR      | LR       | PValue   | logCPM   | logFC    |
|-----------|----------|----------|----------|----------|----------|
| Gch1      | 1.88E-06 | 2.97E+01 | 5.02E-08 | 2.21E+00 | 1.15E+00 |
| AABR07037 | 1.03E-02 | 1.13E+01 | 7.75E-04 | #####    | 1.82E+00 |
| Atrx      | 1.27E-03 | 1.58E+01 | 6.94E-05 | #####    | 2.61E+00 |
| Slc40a1   | 1.56E-03 | 1.54E+01 | 8.79E-05 | 2.99E+00 | 1.33E+00 |
| LOC100362 | 6.97E-03 | 1.21E+01 | 4.91E-04 | 1.63E+00 | 2.75E+00 |
| Cxcl14    | 2.99E-03 | 1.40E+01 | 1.86E-04 | 1.11E+00 | 1.03E+00 |
| LOC100361 | 6.42E-04 | 1.73E+01 | 3.17E-05 | #####    | 2.77E+00 |
| Foxd2     | 7.16E-03 | 1.21E+01 | 5.07E-04 | 7.97E-01 | 1.06E+00 |
| Avp       | 4.28E-02 | 8.18E+00 | 4.24E-03 | #####    | 1.30E+00 |
| Snip1     | 2.16E-02 | 9.70E+00 | 1.85E-03 | 9.14E-01 | 2.95E+00 |
| AABR07002 | 7.20E-15 | 6.96E+01 | 7.40E-17 | 2.48E-01 | 3.89E+00 |
| Hmgb3     | 3.83E-02 | 8.43E+00 | 3.69E-03 | 2.80E+00 | 1.92E+00 |
| Dyrk3     | 1.45E-14 | 6.81E+01 | 1.56E-16 | 2.21E+00 | 1.70E+00 |
| Irs2      | #####    | 7.73E+02 | #####    | 6.85E+00 | 1.81E+00 |
| M6pr      | 1.31E-03 | 1.58E+01 | 7.20E-05 | 1.79E+00 | 1.53E+00 |
| LOC100360 | 2.84E-03 | 1.41E+01 | 1.75E-04 | 1.26E+00 | 1.37E+00 |
| Ucp3      | 6.83E-16 | 7.43E+01 | 6.60E-18 | 2.86E+00 | 1.40E+00 |
| NEWGENE_1 | 1.47E-02 | 1.05E+01 | 1.18E-03 | 1.90E+00 | 1.47E+00 |
| Hs3st3b1  | 3.76E-02 | 8.47E+00 | 3.61E-03 | #####    | 1.25E+00 |
| Mfsd14a   | 1.04E-02 | 1.13E+01 | 7.86E-04 | 1.87E+00 | 1.14E+00 |
| Noct      | 2.29E-41 | 1.93E+02 | 5.52E-44 | 4.19E+00 | 1.34E+00 |
| Fhl5      | 2.89E-02 | 9.04E+00 | 2.64E-03 | #####    | 1.40E+00 |
| Prrg3     | 4.35E-02 | 8.14E+00 | 4.33E-03 | #####    | 2.64E+00 |
| LOC100912 | 3.10E-03 | 1.39E+01 | 1.94E-04 | 4.41E-01 | 3.08E+00 |
| Ano5      | 6.18E-36 | 1.68E+02 | 1.93E-38 | 4.11E+00 | 1.24E+00 |
| Pdk4      | #####    | 1.22E+03 | #####    | 7.52E+00 | 1.92E+00 |
| LOC690326 | 2.20E-02 | 9.65E+00 | 1.89E-03 | #####    | 1.51E+00 |
| Hspala    | 1.04E-03 | 1.63E+01 | 5.46E-05 | 8.63E-01 | 2.26E+00 |
| Klf2      | 2.18E-22 | 1.05E+02 | 1.33E-24 | 7.78E+00 | 1.01E+00 |
| LOC100911 | 1.36E-03 | 1.57E+01 | 7.45E-05 | #####    | 3.85E+00 |
| Eya2      | 4.24E-43 | 2.01E+02 | 9.93E-46 | 4.46E+00 | 1.36E+00 |
| Cetn3     | 7.24E-03 | 1.21E+01 | 5.13E-04 | 2.99E+00 | 2.36E+00 |
| Smc1      | 2.14E-03 | 1.47E+01 | 1.26E-04 | #####    | 2.31E+00 |
| Spert     | 4.58E-02 | 8.02E+00 | 4.62E-03 | #####    | 4.51E+00 |
| Tmprss11g | 4.28E-03 | 1.32E+01 | 2.82E-04 | #####    | 2.96E+00 |
| Gpr63     | 4.20E-13 | 6.12E+01 | 5.12E-15 | 2.48E+00 | 1.71E+00 |
| AABR07041 | 4.35E-02 | 8.14E+00 | 4.34E-03 | #####    | 3.31E+00 |
| Rpl39     | 2.86E-02 | 9.07E+00 | 2.60E-03 | 7.32E-01 | 2.11E+00 |
| El12      | 7.14E-24 | 1.12E+02 | 3.97E-26 | 3.92E+00 | 1.12E+00 |
| AABR07049 | 2.75E-02 | 9.16E+00 | 2.48E-03 | #####    | 4.80E+00 |
| Gal       | 1.21E-07 | 3.54E+01 | 2.69E-09 | 6.10E-01 | 2.10E+00 |
| Tlk1      | 2.81E-02 | 9.11E+00 | 2.55E-03 | 9.98E-01 | 1.03E+00 |
| Angptl4   | 1.06E-04 | 2.12E+01 | 4.21E-06 | 2.27E+00 | 1.02E+00 |
| Grid1     | 8.43E-03 | 1.17E+01 | 6.12E-04 | 3.03E-01 | 1.18E+00 |
| Kif4a     | 1.57E-02 | 1.04E+01 | 1.27E-03 | 3.42E-01 | 1.08E+00 |
| NEWGENE_6 | 1.23E-02 | 1.09E+01 | 9.55E-04 | #####    | 6.11E+00 |
| Tmprss2   | 1.25E-04 | 2.08E+01 | 5.08E-06 | 1.35E+00 | 1.34E+00 |
| LOC102550 | 1.38E-02 | 1.06E+01 | 1.10E-03 | 4.31E+00 | 1.07E+00 |
| Cdh26     | 5.30E-06 | 2.75E+01 | 1.56E-07 | 2.46E+00 | 1.10E+00 |
| LOC100909 | 4.95E-02 | 7.86E+00 | 5.06E-03 | #####    | 1.27E+00 |
| Nr4a3     | #####    | 1.26E+03 | #####    | 4.54E+00 | 4.09E+00 |
| LOC103694 | 4.16E-04 | 1.82E+01 | 1.94E-05 | 7.20E+00 | 1.81E+00 |

|           |          |          |          |          |          |
|-----------|----------|----------|----------|----------|----------|
| Gstm5     | 1.86E-02 | 1.00E+01 | 1.56E-03 | 8.96E-01 | 2.82E+00 |
| Slc4a1    | 2.07E-46 | 2.17E+02 | 4.34E-49 | 3.69E+00 | 1.75E+00 |
| Atf3      | 1.72E-27 | 1.29E+02 | 7.68E-30 | 4.14E+00 | 1.09E+00 |
| Sall1     | 2.22E-02 | 9.63E+00 | 1.92E-03 | 1.50E-01 | 1.12E+00 |
| Hspa1b    | 1.23E-49 | 2.32E+02 | 2.23E-52 | 4.84E+00 | 3.28E+00 |
| RGD156414 | 2.20E-02 | 9.65E+00 | 1.89E-03 | #####    | 1.70E+00 |
| LOC100910 | 4.36E-07 | 3.27E+01 | 1.05E-08 | 4.45E+00 | 3.45E+00 |
| Coq10b    | 9.09E-36 | 1.67E+02 | 2.89E-38 | 5.01E+00 | 1.03E+00 |
| Oas12     | 4.90E-32 | 1.50E+02 | 1.75E-34 | 4.72E+00 | 1.03E+00 |
| LOC103692 | 2.31E-05 | 2.44E+01 | 7.95E-07 | 3.51E+00 | 2.19E+00 |
| Kcna5     | 1.52E-19 | 9.15E+01 | 1.11E-21 | 3.89E+00 | 1.01E+00 |
| Nhp2      | 5.57E-03 | 1.26E+01 | 3.80E-04 | 1.73E+00 | 2.79E+00 |
| Notch4    | 6.68E-52 | 2.43E+02 | 1.09E-54 | 6.54E+00 | 1.15E+00 |
| LOC100910 | 2.97E-03 | 1.40E+01 | 1.85E-04 | 3.14E+00 | 2.53E+00 |
| Fbxo41    | 2.66E-02 | 9.23E+00 | 2.39E-03 | 1.09E-01 | 1.05E+00 |
| Elov16    | 1.31E-02 | 1.08E+01 | 1.03E-03 | #####    | 5.30E+00 |
| Apls3     | 2.25E-04 | 1.96E+01 | 9.65E-06 | 1.60E+00 | 1.07E+00 |
| Fam134b   | 6.69E-05 | 2.21E+01 | 2.53E-06 | 1.83E+00 | 2.08E+00 |
| LOC100359 | 3.16E-02 | 8.85E+00 | 2.93E-03 | #####    | 1.88E+00 |
| LOC100365 | 3.93E-04 | 1.84E+01 | 1.82E-05 | 3.09E+00 | 1.28E+00 |
| Tprkb     | 2.13E-02 | 9.72E+00 | 1.82E-03 | #####    | 4.30E+00 |
| Myo16     | 4.02E-02 | 8.31E+00 | 3.93E-03 | #####    | 1.31E+00 |
| Mrp153    | 2.68E-03 | 1.42E+01 | 1.63E-04 | 2.80E+00 | 2.78E+00 |
| Myom3     | 7.97E-20 | 9.28E+01 | 5.71E-22 | 3.80E+00 | 1.03E+00 |
| Inhbb     | 6.80E-14 | 6.49E+01 | 7.87E-16 | 2.84E+00 | 1.21E+00 |
| Pcdh15    | 3.98E-02 | 8.34E+00 | 3.88E-03 | #####    | 4.09E+00 |
| Crem      | 2.55E-38 | 1.79E+02 | 7.33E-41 | 4.74E+00 | 1.12E+00 |
| LOC100911 | 2.68E-04 | 1.92E+01 | 1.17E-05 | 4.34E+00 | 1.20E+00 |
| Rn50_1_13 | 8.01E-03 | 1.19E+01 | 5.76E-04 | #####    | 3.30E+00 |
| Natd1     | 1.93E-02 | 9.94E+00 | 1.62E-03 | #####    | 1.88E+00 |
| LOC103690 | 1.12E-04 | 2.11E+01 | 4.47E-06 | #####    | 2.33E+00 |
| Myo7b     | 2.70E-04 | 1.92E+01 | 1.18E-05 | 1.57E+00 | 1.06E+00 |
| LOC100912 | 5.60E-03 | 1.26E+01 | 3.83E-04 | 3.21E+00 | 1.11E+00 |
| Chrn2     | 3.73E-02 | 8.49E+00 | 3.57E-03 | #####    | 2.29E+00 |
| Cebpb     | 7.81E-40 | 1.86E+02 | 2.05E-42 | 7.12E+00 | 1.33E+00 |
| RGD130518 | 7.92E-05 | 2.18E+01 | 3.04E-06 | 2.02E+00 | 1.01E+00 |
| Cldn15    | 1.16E-03 | 1.60E+01 | 6.26E-05 | 1.16E+00 | 1.08E+00 |
| AABR07027 | 4.58E-02 | 8.03E+00 | 4.61E-03 | 1.02E-01 | 1.96E+00 |
| RGD156535 | 1.29E-16 | 7.77E+01 | 1.19E-18 | 3.71E+00 | 1.55E+00 |
| Fam222a   | 6.25E-07 | 3.20E+01 | 1.54E-08 | 7.07E-01 | 1.88E+00 |
| Vwa5a     | 1.80E-03 | 1.51E+01 | 1.03E-04 | #####    | 2.40E+00 |
| Hist1h1t  | 1.36E-02 | 1.07E+01 | 1.08E-03 | #####    | 2.79E+00 |
| AABR07036 | 9.65E-03 | 1.14E+01 | 7.17E-04 | #####    | 2.21E+00 |
| Adra1d    | 4.95E-05 | 2.28E+01 | 1.82E-06 | 1.81E+00 | 1.07E+00 |
| Mepce     | 7.74E-03 | 1.19E+01 | 5.54E-04 | 9.84E-02 | 2.07E+00 |
| Fos12     | 3.56E-37 | 1.74E+02 | 1.08E-39 | 4.21E+00 | 1.35E+00 |
| Habp2     | 2.09E-03 | 1.47E+01 | 1.23E-04 | 9.63E-01 | 1.08E+00 |
| Ogn       | 2.61E-04 | 1.93E+01 | 1.14E-05 | 4.02E+00 | 1.74E+00 |
| Retnlg    | 1.82E-02 | 1.01E+01 | 1.51E-03 | #####    | 1.52E+00 |
| Col9a3    | 5.08E-07 | 3.24E+01 | 1.23E-08 | 1.12E+00 | #####    |
| Ltbp2     | #####    | 5.83E+02 | #####    | 6.57E+00 | #####    |
| Clec2d    | 1.78E-04 | 2.01E+01 | 7.46E-06 | #####    | #####    |
| Tnc       | 1.34E-17 | 8.23E+01 | 1.16E-19 | 2.72E+00 | #####    |
| Glyat11   | 3.47E-07 | 3.32E+01 | 8.27E-09 | #####    | #####    |

|           |          |          |          |          |       |
|-----------|----------|----------|----------|----------|-------|
| Acp5      | 2.22E-10 | 4.84E+01 | 3.50E-12 | 1.99E+00 | ##### |
| LOC100910 | 4.94E-03 | 1.29E+01 | 3.30E-04 | 3.52E-01 | ##### |
| Cdhr1     | 2.08E-05 | 2.46E+01 | 7.06E-07 | 1.55E+00 | ##### |
| LOC100911 | 2.33E-02 | 9.52E+00 | 2.03E-03 | 5.44E-01 | ##### |
| Gdf10     | 1.46E-06 | 3.02E+01 | 3.84E-08 | #####    | ##### |
| Aass      | 4.68E-02 | 7.98E+00 | 4.74E-03 | #####    | ##### |
| AABR07065 | 2.05E-03 | 1.48E+01 | 1.20E-04 | #####    | ##### |
| LOC103693 | 3.99E-02 | 8.33E+00 | 3.89E-03 | 1.58E-02 | ##### |
| Cd180     | 1.82E-03 | 1.50E+01 | 1.05E-04 | 9.46E-01 | ##### |
| Mmp12     | 1.63E-02 | 1.03E+01 | 1.33E-03 | #####    | ##### |
| Adamts17  | 6.52E-03 | 1.23E+01 | 4.54E-04 | 8.34E-01 | ##### |
| Mup5      | 5.72E-03 | 1.26E+01 | 3.92E-04 | #####    | ##### |
| Kcnel     | 3.95E-04 | 1.84E+01 | 1.83E-05 | 8.07E-01 | ##### |
| Selp      | 6.96E-03 | 1.22E+01 | 4.91E-04 | 4.07E-01 | ##### |
| Col8a1    | 2.53E-93 | 4.34E+02 | 1.95E-96 | 5.83E+00 | ##### |
| Pil6      | 1.14E-81 | 3.81E+02 | 9.12E-85 | 7.24E+00 | ##### |
| Pmfbp1    | 1.07E-02 | 1.12E+01 | 8.15E-04 | #####    | ##### |
| Tpm2      | 5.41E-64 | 2.99E+02 | 6.01E-67 | 5.64E+00 | ##### |
| Grem1     | 6.13E-06 | 2.72E+01 | 1.83E-07 | #####    | ##### |
| Cd16311   | 3.17E-06 | 2.86E+01 | 8.81E-08 | #####    | ##### |
| Pex5      | 1.45E-02 | 1.06E+01 | 1.16E-03 | #####    | ##### |
| Igsf10    | 3.71E-40 | 1.88E+02 | 9.62E-43 | 4.84E+00 | ##### |
| Asic5     | 3.56E-02 | 8.59E+00 | 3.38E-03 | #####    | ##### |
| Asns      | 9.97E-03 | 1.14E+01 | 7.45E-04 | 2.40E-01 | ##### |
| Panx3     | 2.10E-04 | 1.97E+01 | 8.91E-06 | #####    | ##### |
| Itga8     | 1.94E-14 | 6.75E+01 | 2.13E-16 | 3.16E+00 | ##### |
| Taslr3    | 1.27E-05 | 2.57E+01 | 4.05E-07 | #####    | ##### |
| Snai2     | 5.32E-03 | 1.27E+01 | 3.60E-04 | 6.51E-01 | ##### |
| Grl13     | 1.14E-03 | 1.61E+01 | 6.12E-05 | #####    | ##### |
| AABR07051 | 2.14E-03 | 1.47E+01 | 1.27E-04 | #####    | ##### |
| AABR07060 | #####    | 5.18E+02 | #####    | 3.95E+00 | ##### |
| Greb11    | 3.34E-02 | 8.74E+00 | 3.12E-03 | 1.95E-01 | ##### |
| Tlr10     | 1.58E-02 | 1.04E+01 | 1.28E-03 | #####    | ##### |
| Podn11    | 3.14E-02 | 8.86E+00 | 2.91E-03 | #####    | ##### |
| LOC102553 | 3.49E-02 | 8.63E+00 | 3.30E-03 | #####    | ##### |
| Clec2d    | 4.59E-02 | 8.02E+00 | 4.63E-03 | #####    | ##### |
| LOC684208 | 2.32E-02 | 9.53E+00 | 2.02E-03 | #####    | ##### |
| Lrrc17    | 3.43E-06 | 2.85E+01 | 9.57E-08 | 2.45E+00 | ##### |
| Col8a2    | 1.07E-47 | 2.23E+02 | 2.15E-50 | 3.88E+00 | ##### |
| NEWGENE_6 | 9.51E-03 | 1.15E+01 | 7.05E-04 | 6.40E-01 | ##### |
| Actg2     | 8.21E-28 | 1.30E+02 | 3.65E-30 | 3.50E+00 | ##### |
| Fst       | 4.16E-04 | 1.82E+01 | 1.94E-05 | 9.15E-01 | ##### |
| Rpl30     | 2.26E-50 | 2.35E+02 | 3.97E-53 | 5.62E+00 | ##### |
| Igh-6     | 1.18E-16 | 7.79E+01 | 1.07E-18 | 2.15E+00 | ##### |
| Il1rn     | 3.64E-03 | 1.35E+01 | 2.33E-04 | 7.56E-01 | ##### |
| AABR07051 | 6.75E-03 | 1.22E+01 | 4.72E-04 | #####    | ##### |
| Uchl1     | 1.16E-07 | 3.55E+01 | 2.58E-09 | 1.45E+00 | ##### |
| LOC100912 | 1.21E-02 | 1.09E+01 | 9.38E-04 | 2.23E-01 | ##### |
| RGD131174 | 8.06E-36 | 1.68E+02 | 2.54E-38 | 3.48E+00 | ##### |
| LOC100911 | 1.39E-02 | 1.06E+01 | 1.11E-03 | #####    | ##### |
| Col11a1   | 1.94E-29 | 1.38E+02 | 8.04E-32 | 2.81E+00 | ##### |
| Chi311    | 1.06E-26 | 1.25E+02 | 5.02E-29 | 4.11E+00 | ##### |
| Col10a1   | 6.46E-21 | 9.79E+01 | 4.35E-23 | 8.36E-01 | ##### |
| AABR07051 | 1.31E-03 | 1.58E+01 | 7.15E-05 | #####    | ##### |

|           |          |          |          |          |       |
|-----------|----------|----------|----------|----------|-------|
| Zfp7      | 3.10E-02 | 8.89E+00 | 2.87E-03 | #####    | ##### |
| Fbln7     | 1.06E-07 | 3.57E+01 | 2.34E-09 | 1.04E+00 | ##### |
| AABR07051 | 1.31E-02 | 1.08E+01 | 1.03E-03 | #####    | ##### |
| Rab17     | 2.24E-02 | 9.61E+00 | 1.93E-03 | #####    | ##### |
| Fam180a   | 4.05E-11 | 5.19E+01 | 5.99E-13 | 1.63E+00 | ##### |
| Wisp1     | 5.43E-07 | 3.23E+01 | 1.32E-08 | #####    | ##### |
| Igfbp2    | 1.29E-02 | 1.08E+01 | 1.01E-03 | #####    | ##### |
| Slc27a2   | 5.93E-05 | 2.24E+01 | 2.22E-06 | #####    | ##### |
| Evi2a     | 8.37E-04 | 1.67E+01 | 4.31E-05 | 1.30E+00 | ##### |
| C1ql3     | 2.34E-02 | 9.51E+00 | 2.04E-03 | 1.59E-01 | ##### |
| Colla1    | 6.96E-96 | 4.46E+02 | 4.72E-99 | 9.11E+00 | ##### |
| Tnfsf18   | 5.32E-04 | 1.77E+01 | 2.55E-05 | #####    | ##### |
| Sncg      | 1.50E-17 | 8.21E+01 | 1.31E-19 | 3.19E+00 | ##### |
| Knop1     | 5.33E-03 | 1.27E+01 | 3.61E-04 | #####    | ##### |
| AABR07066 | 1.19E-02 | 1.10E+01 | 9.19E-04 | 1.43E-02 | ##### |
| LOC100912 | 6.80E-04 | 1.72E+01 | 3.40E-05 | #####    | ##### |
| Esyt3     | 5.71E-06 | 2.74E+01 | 1.69E-07 | 3.90E-01 | ##### |
| LOC682793 | 1.04E-07 | 3.57E+01 | 2.30E-09 | 1.70E+00 | ##### |
| Nov       | 2.42E-29 | 1.37E+02 | 1.01E-31 | 3.94E+00 | ##### |
| Adamts18  | 1.10E-02 | 1.12E+01 | 8.39E-04 | #####    | ##### |
| Pak1      | 1.70E-03 | 1.52E+01 | 9.72E-05 | 1.35E+00 | ##### |
| Myh3      | 1.05E-02 | 1.13E+01 | 7.89E-04 | #####    | ##### |
| Fam221a   | 4.12E-02 | 8.26E+00 | 4.05E-03 | #####    | ##### |
| Sectm1b   | 7.47E-04 | 1.70E+01 | 3.79E-05 | #####    | ##### |
| LOC100361 | 1.24E-06 | 3.06E+01 | 3.21E-08 | 6.42E-01 | ##### |
| Bmp3      | 3.80E-02 | 8.45E+00 | 3.65E-03 | #####    | ##### |
| Grem2     | 1.21E-04 | 2.09E+01 | 4.90E-06 | #####    | ##### |
| RGD130492 | 4.99E-06 | 2.76E+01 | 1.46E-07 | 6.95E-01 | ##### |
| Rn50_11_C | 5.44E-06 | 2.75E+01 | 1.60E-07 | #####    | ##### |
| Anxa8     | 8.03E-05 | 2.18E+01 | 3.10E-06 | #####    | ##### |
| Nmnat2    | 2.39E-02 | 9.47E+00 | 2.09E-03 | #####    | ##### |
| Scd       | 1.10E-06 | 3.08E+01 | 2.82E-08 | #####    | ##### |
| Kcnab1    | 2.17E-05 | 2.45E+01 | 7.41E-07 | 1.19E+00 | ##### |
| Bnc2      | 1.78E-02 | 1.01E+01 | 1.47E-03 | 5.29E-01 | ##### |
| Timp1     | 4.58E-28 | 1.31E+02 | 2.01E-30 | 4.08E+00 | ##### |
| Serpinf1  | 2.45E-73 | 3.42E+02 | 2.42E-76 | 6.59E+00 | ##### |
| AABR07051 | 2.76E-02 | 9.15E+00 | 2.49E-03 | #####    | ##### |
| Hapln1    | 9.60E-08 | 3.59E+01 | 2.11E-09 | 3.96E-01 | ##### |
| Zcchc12   | 4.85E-02 | 7.90E+00 | 4.94E-03 | #####    | ##### |
| Surf2     | 1.20E-03 | 1.60E+01 | 6.47E-05 | 2.34E+00 | ##### |
| Figf      | 3.64E-20 | 9.44E+01 | 2.54E-22 | 3.54E+00 | ##### |
| Cnn1      | 9.88E-18 | 8.29E+01 | 8.44E-20 | 2.94E+00 | ##### |
| Ighv1-47  | 1.80E-03 | 1.51E+01 | 1.03E-04 | #####    | ##### |
| Olr1637   | 2.24E-02 | 9.61E+00 | 1.93E-03 | #####    | ##### |
| Fmod      | 2.14E-31 | 1.47E+02 | 8.08E-34 | 3.44E+00 | ##### |
| LOC100911 | 7.02E-05 | 2.20E+01 | 2.67E-06 | 3.63E+00 | ##### |
| Pcgf1     | 2.89E-09 | 4.31E+01 | 5.15E-11 | 5.92E-02 | ##### |
| AABR07065 | 7.65E-07 | 3.16E+01 | 1.92E-08 | #####    | ##### |
| Cp        | 1.44E-35 | 1.66E+02 | 4.66E-38 | 4.79E+00 | ##### |
| Srpx2     | 2.08E-05 | 2.46E+01 | 7.04E-07 | 2.13E+00 | ##### |
| Slc27a6   | 1.34E-02 | 1.07E+01 | 1.05E-03 | #####    | ##### |
| Atp6ap11  | 1.31E-04 | 2.07E+01 | 5.36E-06 | 1.39E+00 | ##### |
| LOC103689 | 4.76E-02 | 7.94E+00 | 4.84E-03 | 2.18E+00 | ##### |
| Msln      | 8.54E-05 | 2.16E+01 | 3.30E-06 | 3.16E-01 | ##### |

|           |          |          |          |          |       |
|-----------|----------|----------|----------|----------|-------|
| Cpz       | 2.10E-03 | 1.47E+01 | 1.24E-04 | 1.52E+00 | ##### |
| Col12a1   | 3.87E-23 | 1.08E+02 | 2.23E-25 | 3.65E+00 | ##### |
| Six2      | 6.35E-03 | 1.23E+01 | 4.42E-04 | #####    | ##### |
| NEWGENE_1 | 1.82E-02 | 1.01E+01 | 1.51E-03 | 4.05E-01 | ##### |
| RGD156184 | 1.41E-03 | 1.56E+01 | 7.82E-05 | 9.52E-01 | ##### |
| Tmem45b   | 1.23E-02 | 1.09E+01 | 9.50E-04 | #####    | ##### |
| Trh       | 5.31E-13 | 6.07E+01 | 6.58E-15 | 2.15E+00 | ##### |
| Btn110    | 1.75E-02 | 1.01E+01 | 1.45E-03 | #####    | ##### |
| AABR07034 | 3.19E-05 | 2.37E+01 | 1.13E-06 | #####    | ##### |
| Clec11a   | 1.67E-46 | 2.17E+02 | 3.44E-49 | 4.09E+00 | ##### |
| C3        | 4.41E-16 | 7.52E+01 | 4.18E-18 | 2.23E+00 | ##### |
| Bcan      | 5.92E-04 | 1.75E+01 | 2.88E-05 | #####    | ##### |
| Cilp2     | 3.09E-23 | 1.09E+02 | 1.77E-25 | 1.91E+00 | ##### |
| Gpm6a     | 1.50E-12 | 5.86E+01 | 1.93E-14 | 3.10E+00 | ##### |
| Rn50_14_C | 2.99E-02 | 8.97E+00 | 2.74E-03 | #####    | ##### |
| Selenbp1  | 6.06E-20 | 9.34E+01 | 4.29E-22 | 3.27E+00 | ##### |
| Testin    | 7.97E-03 | 1.19E+01 | 5.73E-04 | #####    | ##### |
| AABR07066 | 2.32E-02 | 9.53E+00 | 2.03E-03 | #####    | ##### |
| Chod1     | 5.42E-08 | 3.70E+01 | 1.15E-09 | 4.37E-01 | ##### |
| Comp      | #####    | 7.28E+02 | #####    | 4.42E+00 | ##### |
| Triap1    | 9.60E-06 | 2.63E+01 | 2.99E-07 | 1.39E+00 | ##### |
| Ptx3      | 1.13E-03 | 1.61E+01 | 6.04E-05 | #####    | ##### |
| Hk3       | 3.26E-03 | 1.38E+01 | 2.06E-04 | 5.45E-01 | ##### |
| Col2a1    | 0.00E+00 | 1.68E+03 | 0.00E+00 | 4.30E+00 | ##### |
| Sfrp2     | #####    | 5.49E+02 | #####    | 4.62E+00 | ##### |
| Islr      | 1.85E-79 | 3.70E+02 | 1.60E-82 | 5.66E+00 | ##### |
| AABR07051 | 3.66E-05 | 2.34E+01 | 1.32E-06 | #####    | ##### |
| Pcsk1     | 4.35E-02 | 8.14E+00 | 4.34E-03 | #####    | ##### |
| Pnoc      | 1.49E-04 | 2.04E+01 | 6.14E-06 | #####    | ##### |
| Sez61     | 5.94E-04 | 1.75E+01 | 2.89E-05 | #####    | ##### |
| Krt18     | 3.12E-03 | 1.39E+01 | 1.95E-04 | #####    | ##### |
| Tnfrsf19  | 1.78E-02 | 1.01E+01 | 1.47E-03 | 7.25E-01 | ##### |
| Dpep3     | 3.03E-03 | 1.39E+01 | 1.89E-04 | #####    | ##### |
| Ccl26     | 3.05E-02 | 8.92E+00 | 2.81E-03 | #####    | ##### |
| Bgn       | #####    | 6.06E+02 | #####    | 8.16E+00 | ##### |
| Ptgs2     | 2.14E-07 | 3.42E+01 | 4.97E-09 | 2.02E+00 | ##### |
| Ntrk3     | 1.40E-05 | 2.55E+01 | 4.49E-07 | 8.27E-01 | ##### |
| Bmp8a     | 4.26E-02 | 8.19E+00 | 4.21E-03 | #####    | ##### |
| Fcnb      | 3.12E-04 | 1.89E+01 | 1.40E-05 | 7.44E-01 | ##### |
| Ighg      | 6.90E-03 | 1.22E+01 | 4.85E-04 | #####    | ##### |
| Pi15      | 2.94E-02 | 9.00E+00 | 2.69E-03 | #####    | ##### |
| Ahnak2    | 1.03E-45 | 2.14E+02 | 2.22E-48 | 5.02E+00 | ##### |
| Ibsp      | 4.52E-61 | 2.85E+02 | 5.44E-64 | 1.79E+00 | ##### |
| Adh7      | 2.44E-04 | 1.94E+01 | 1.06E-05 | 1.24E+00 | ##### |
| Matn4     | 7.05E-09 | 4.13E+01 | 1.33E-10 | 1.91E+00 | ##### |
| Scube3    | 2.96E-04 | 1.90E+01 | 1.31E-05 | 1.29E+00 | ##### |
| Osr1      | 2.08E-09 | 4.38E+01 | 3.65E-11 | 2.59E+00 | ##### |
| Acan      | 1.32E-38 | 1.81E+02 | 3.72E-41 | 1.73E+00 | ##### |
| Gpr39     | 1.50E-03 | 1.55E+01 | 8.37E-05 | #####    | ##### |
| AABR07051 | 8.39E-04 | 1.67E+01 | 4.33E-05 | #####    | ##### |
| Prrx2     | 2.57E-05 | 2.41E+01 | 8.95E-07 | 1.44E+00 | ##### |
| Mmp13     | 1.11E-19 | 9.22E+01 | 8.02E-22 | 1.93E-01 | ##### |
| Cemip     | 1.12E-02 | 1.11E+01 | 8.58E-04 | 2.22E-01 | ##### |
| Ighv12-3  | 6.58E-04 | 1.73E+01 | 3.27E-05 | #####    | ##### |

|           |          |          |          |          |       |
|-----------|----------|----------|----------|----------|-------|
| AABR0703C | 1.31E-03 | 1.58E+01 | 7.21E-05 | #####    | ##### |
| Mfap5     | 5.35E-48 | 2.24E+02 | 1.01E-50 | 5.34E+00 | ##### |
| Krt8      | 2.68E-02 | 9.21E+00 | 2.41E-03 | #####    | ##### |
| Cdkn2b    | 2.30E-02 | 9.55E+00 | 2.00E-03 | #####    | ##### |
| Nlrp10    | 9.94E-03 | 1.14E+01 | 7.42E-04 | #####    | ##### |
| Dnah7     | 1.27E-08 | 4.00E+01 | 2.48E-10 | 2.42E+00 | ##### |
| LOC257642 | 1.44E-02 | 1.06E+01 | 1.15E-03 | #####    | ##### |
| N4bp3     | 9.63E-03 | 1.15E+01 | 7.14E-04 | 7.36E-02 | ##### |
| C4b       | 1.98E-59 | 2.78E+02 | 2.57E-62 | 5.92E+00 | ##### |
| Apopt1    | 3.43E-05 | 2.35E+01 | 1.23E-06 | 1.91E+00 | ##### |
| Coll17a1  | 7.16E-06 | 2.69E+01 | 2.18E-07 | 1.83E+00 | ##### |
| AABR07021 | 4.35E-02 | 8.14E+00 | 4.33E-03 | #####    | ##### |
| Chad      | 2.27E-20 | 9.54E+01 | 1.55E-22 | 2.64E+00 | ##### |
| Il1b      | 7.76E-04 | 1.69E+01 | 3.94E-05 | 1.49E+00 | ##### |
| Clqtnf3   | 9.88E-07 | 3.10E+01 | 2.52E-08 | 4.63E-01 | ##### |
| Aox1      | 5.87E-25 | 1.17E+02 | 3.10E-27 | 4.44E+00 | ##### |
| Cilp      | 6.38E-33 | 1.54E+02 | 2.21E-35 | 4.65E+00 | ##### |
| R3hdm1    | 4.68E-02 | 7.97E+00 | 4.75E-03 | #####    | ##### |
| Wisp2     | #####    | 1.03E+03 | #####    | 5.04E+00 | ##### |
| Has1      | 2.89E-03 | 1.41E+01 | 1.78E-04 | 1.12E+00 | ##### |
| Cnr1      | 1.20E-02 | 1.10E+01 | 9.29E-04 | #####    | ##### |
| Postn     | 6.36E-63 | 2.94E+02 | 7.26E-66 | 5.07E+00 | ##### |
| Cdhr3     | 1.13E-02 | 1.11E+01 | 8.66E-04 | #####    | ##### |
| Plekhg4   | 1.89E-02 | 9.98E+00 | 1.58E-03 | #####    | ##### |
| Ctsk      | 1.52E-39 | 1.85E+02 | 4.13E-42 | 4.83E+00 | ##### |
| Rbpj1     | 6.55E-03 | 1.23E+01 | 4.56E-04 | #####    | ##### |
| Esm1      | 5.81E-07 | 3.22E+01 | 1.42E-08 | 1.58E+00 | ##### |
| Arhgef16  | 6.01E-03 | 1.25E+01 | 4.16E-04 | #####    | ##### |
| Igfbp6    | 8.50E-60 | 2.79E+02 | 1.05E-62 | 5.61E+00 | ##### |
| Bglap     | 5.41E-37 | 1.73E+02 | 1.65E-39 | 1.20E+00 | ##### |
| Clec3a    | 2.80E-45 | 2.12E+02 | 6.13E-48 | 1.49E+00 | ##### |
| Fcrl2     | 1.07E-05 | 2.60E+01 | 3.36E-07 | 1.19E+00 | ##### |
| Retn      | 3.93E-02 | 8.37E+00 | 3.81E-03 | #####    | ##### |
| AABR07011 | 2.21E-06 | 2.94E+01 | 5.98E-08 | 4.22E+00 | ##### |
| LOC100911 | 4.07E-03 | 1.33E+01 | 2.65E-04 | 8.13E-01 | ##### |
| Cx3cr1    | 1.59E-02 | 1.04E+01 | 1.29E-03 | #####    | ##### |
| Necab1    | 3.36E-02 | 8.72E+00 | 3.15E-03 | #####    | ##### |
| Fibin     | 1.44E-37 | 1.76E+02 | 4.31E-40 | 4.56E+00 | ##### |
| Nr5a2     | 4.16E-02 | 8.24E+00 | 4.09E-03 | #####    | ##### |
| Fam3b     | 2.24E-02 | 9.61E+00 | 1.93E-03 | #####    | ##### |
| LOC299282 | 1.65E-09 | 4.43E+01 | 2.86E-11 | 2.21E+00 | ##### |
| AABR07065 | 2.48E-03 | 1.44E+01 | 1.49E-04 | #####    | ##### |
| Robo2     | 1.73E-03 | 1.52E+01 | 9.90E-05 | 9.20E-01 | ##### |
| AABR07025 | 1.41E-02 | 1.06E+01 | 1.13E-03 | #####    | ##### |
| Ephb2     | 4.26E-02 | 8.19E+00 | 4.22E-03 | #####    | ##### |
| Clqtnf5   | 2.21E-33 | 1.56E+02 | 7.56E-36 | 4.27E+00 | ##### |
| Klkb1     | 1.36E-10 | 4.94E+01 | 2.12E-12 | #####    | ##### |
| Ildr2     | 1.13E-02 | 1.11E+01 | 8.62E-04 | 5.81E-01 | ##### |
| Egr2      | 6.03E-09 | 4.16E+01 | 1.12E-10 | 2.63E+00 | ##### |
| Trappc2b  | 4.88E-02 | 7.89E+00 | 4.98E-03 | 5.44E-01 | ##### |
| Rims2     | 2.68E-02 | 9.21E+00 | 2.40E-03 | #####    | ##### |
| Nkd1      | 4.66E-06 | 2.78E+01 | 1.35E-07 | 1.72E+00 | ##### |
| Samsn1    | 4.09E-03 | 1.33E+01 | 2.67E-04 | 6.27E-01 | ##### |
| Frzb      | 7.31E-12 | 5.54E+01 | 9.99E-14 | 2.59E+00 | ##### |

|           |          |          |          |          |       |
|-----------|----------|----------|----------|----------|-------|
| RGD130564 | 6.60E-13 | 6.03E+01 | 8.28E-15 | 2.53E+00 | ##### |
| Sfrp4     | 7.33E-05 | 2.20E+01 | 2.79E-06 | 6.95E-01 | ##### |
| C4a       | 4.97E-81 | 3.78E+02 | 4.14E-84 | 5.63E+00 | ##### |
| Rfxap11   | 3.25E-02 | 8.79E+00 | 3.02E-03 | 5.51E-01 | ##### |
| Spp1      | #####    | 5.01E+02 | #####    | 4.64E+00 | ##### |
| Fam111a   | 0.00E+00 | 3.66E+03 | 0.00E+00 | 5.58E+00 | ##### |
| Il17re    | 5.67E-07 | 3.22E+01 | 1.38E-08 | 4.36E-01 | ##### |
| Rprm      | 6.58E-03 | 1.23E+01 | 4.59E-04 | #####    | ##### |
| Cpxm2     | 5.24E-22 | 1.03E+02 | 3.30E-24 | 3.69E+00 | ##### |
| Crispld1  | 3.08E-05 | 2.38E+01 | 1.09E-06 | 3.16E-01 | ##### |
| Cgref1    | 1.06E-07 | 3.57E+01 | 2.33E-09 | 1.24E+00 | ##### |
| Gng8      | 3.69E-05 | 2.34E+01 | 1.33E-06 | 1.33E+00 | ##### |
| Ccl20     | 8.11E-03 | 1.18E+01 | 5.86E-04 | #####    | ##### |
| Pla2g2a   | 3.58E-69 | 3.23E+02 | 3.64E-72 | 5.90E+00 | ##### |
| Wscd2     | 3.08E-03 | 1.39E+01 | 1.93E-04 | #####    | ##### |
| Tcf23     | 3.82E-04 | 1.84E+01 | 1.76E-05 | #####    | ##### |
| Tnn       | 1.28E-14 | 6.84E+01 | 1.36E-16 | 6.88E-01 | ##### |
| Espn      | 2.40E-03 | 1.44E+01 | 1.45E-04 | #####    | ##### |
| Capn6     | 6.21E-04 | 1.74E+01 | 3.06E-05 | 3.58E-02 | ##### |
| Mmp16     | 4.96E-03 | 1.29E+01 | 3.31E-04 | #####    | ##### |
| Slc7a11   | 2.42E-02 | 9.44E+00 | 2.12E-03 | #####    | ##### |
| Myl1      | 1.41E-10 | 4.93E+01 | 2.19E-12 | 2.60E+00 | ##### |
| Mroh2a    | 3.33E-02 | 8.74E+00 | 3.11E-03 | 9.31E-02 | ##### |
| Itgal10   | 4.83E-11 | 5.15E+01 | 7.17E-13 | 1.24E-01 | ##### |
| Wbp1111   | 3.52E-05 | 2.35E+01 | 1.26E-06 | 2.16E+00 | ##### |
| Pappa2    | 9.45E-08 | 3.59E+01 | 2.07E-09 | 9.75E-01 | ##### |
| Hcar1     | 1.24E-02 | 1.09E+01 | 9.68E-04 | #####    | ##### |
| Kcna6     | 9.80E-04 | 1.64E+01 | 5.14E-05 | #####    | ##### |
| Lrrc15    | 1.25E-02 | 1.09E+01 | 9.76E-04 | #####    | ##### |
| Uts2r     | 2.53E-05 | 2.42E+01 | 8.75E-07 | #####    | ##### |
| P4ha3     | 1.78E-03 | 1.51E+01 | 1.02E-04 | #####    | ##### |
| Loxl1     | 1.91E-58 | 2.73E+02 | 2.54E-61 | 5.79E+00 | ##### |
| LOC102552 | 1.06E-24 | 1.16E+02 | 5.65E-27 | 3.08E+00 | ##### |
| Pamr1     | 3.23E-03 | 1.38E+01 | 2.04E-04 | 6.49E-02 | ##### |
| Mmp9      | 5.71E-14 | 6.53E+01 | 6.50E-16 | 8.20E-01 | ##### |
| Emx2      | 3.99E-02 | 8.33E+00 | 3.90E-03 | #####    | ##### |
| Syt15     | 8.65E-05 | 2.16E+01 | 3.37E-06 | #####    | ##### |
| Ms4a6b1   | 2.59E-02 | 9.28E+00 | 2.31E-03 | 5.34E-01 | ##### |
| Mepe      | 8.57E-06 | 2.65E+01 | 2.64E-07 | #####    | ##### |
| Cxcl1     | 8.13E-04 | 1.68E+01 | 4.17E-05 | 1.22E+00 | ##### |
| P2rx2     | 1.28E-02 | 1.08E+01 | 1.00E-03 | #####    | ##### |
| Kcne4     | 2.97E-02 | 8.99E+00 | 2.72E-03 | 5.42E-01 | ##### |
| Arnt12    | 4.85E-02 | 7.90E+00 | 4.94E-03 | #####    | ##### |
| Cacna2d3  | 1.05E-02 | 1.13E+01 | 7.89E-04 | #####    | ##### |
| Tnmd      | 2.52E-02 | 9.35E+00 | 2.23E-03 | #####    | ##### |
| S100b     | 4.29E-04 | 1.82E+01 | 2.02E-05 | 1.62E+00 | ##### |
| Ptprv     | 6.02E-09 | 4.16E+01 | 1.11E-10 | 7.38E-01 | ##### |
| Col9a1    | 7.93E-04 | 1.68E+01 | 4.05E-05 | #####    | ##### |
| B4galnt3  | 3.18E-03 | 1.38E+01 | 2.00E-04 | #####    | ##### |
| LOC100910 | 1.55E-02 | 1.04E+01 | 1.25E-03 | 2.37E+00 | ##### |
| Gdf6      | 3.61E-03 | 1.36E+01 | 2.31E-04 | 3.49E-01 | ##### |
| Lst1      | 2.22E-02 | 9.64E+00 | 1.91E-03 | 9.16E-03 | ##### |
| Ighm      | 7.81E-48 | 2.24E+02 | 1.49E-50 | 3.62E+00 | ##### |
| LOC103690 | 2.54E-02 | 9.33E+00 | 2.26E-03 | 1.76E+00 | ##### |

|         |          |          |          |       |       |
|---------|----------|----------|----------|-------|-------|
| Ighv8-4 | 3.64E-04 | 1.85E+01 | 1.67E-05 | ##### | ##### |
|---------|----------|----------|----------|-------|-------|
