# Supplementary figures and images for: Yixin‐Shu Capsules Ameliorated Ischemia‐Induced Heart Failure by Restoring Trx2 and Inhibiting JNK/p38 Activation
Source: Hindawi journal article supplement (doi:10.1155/2021/8049079), 2021-01-01

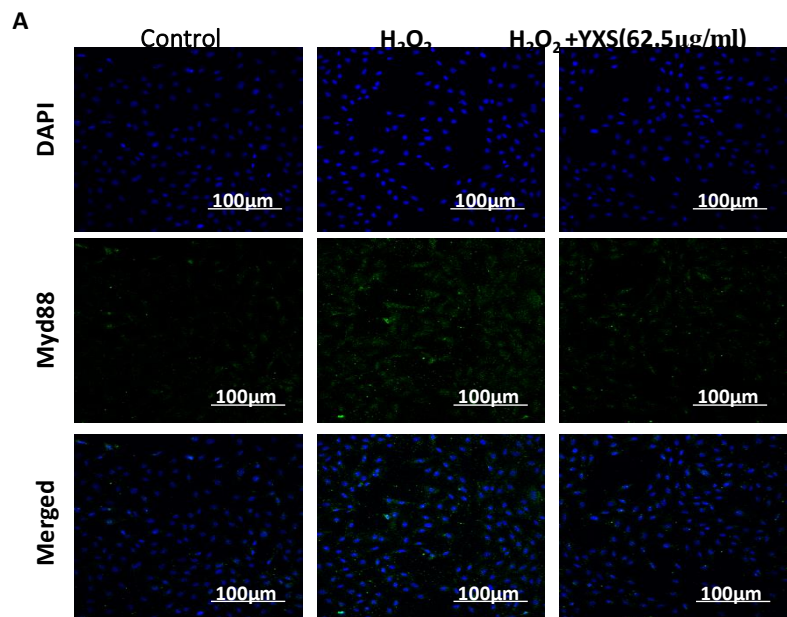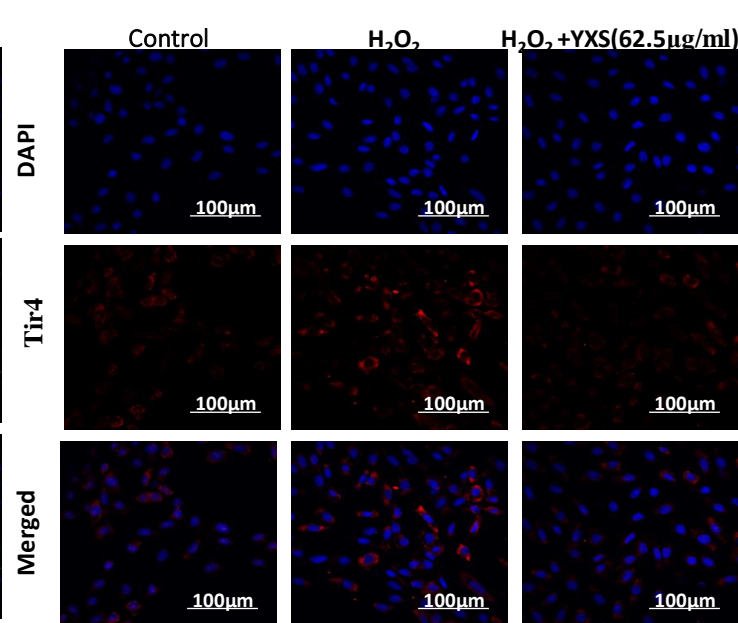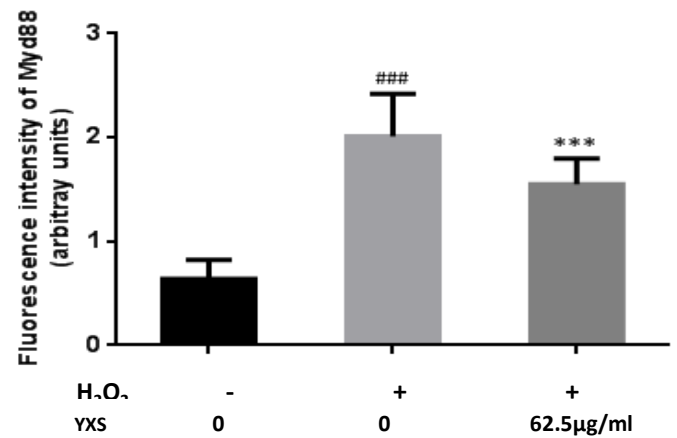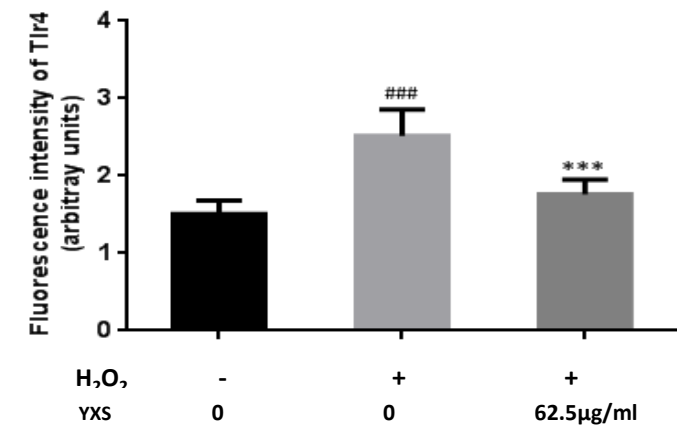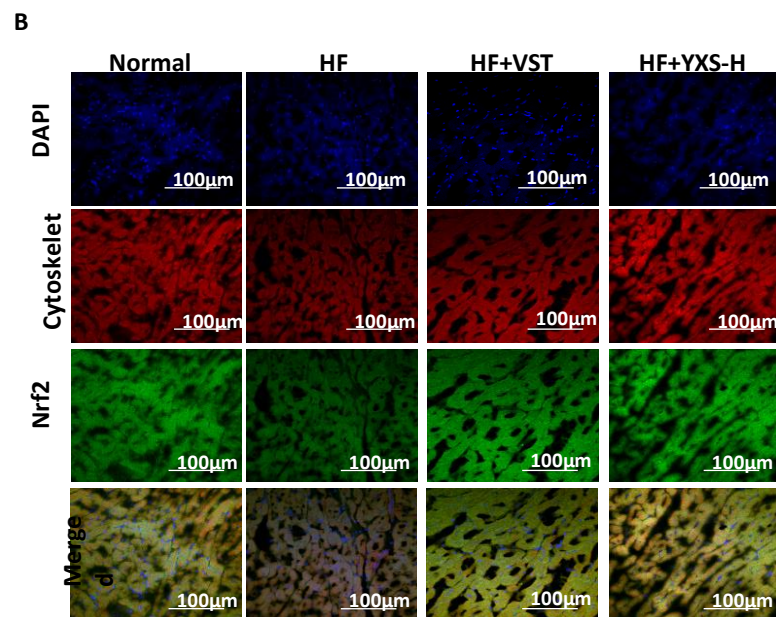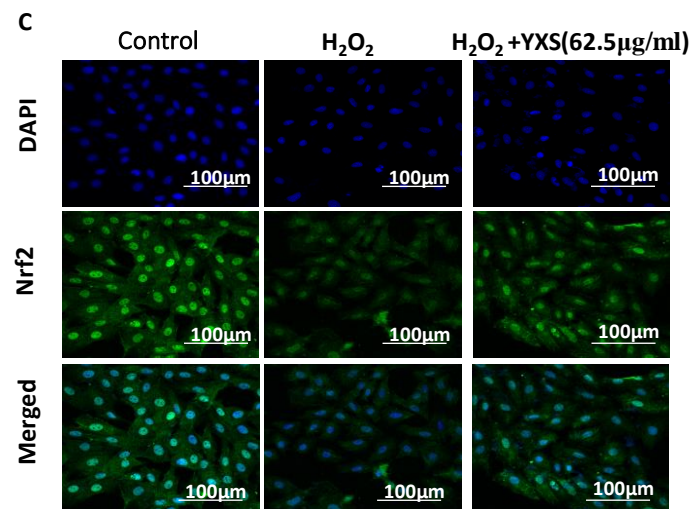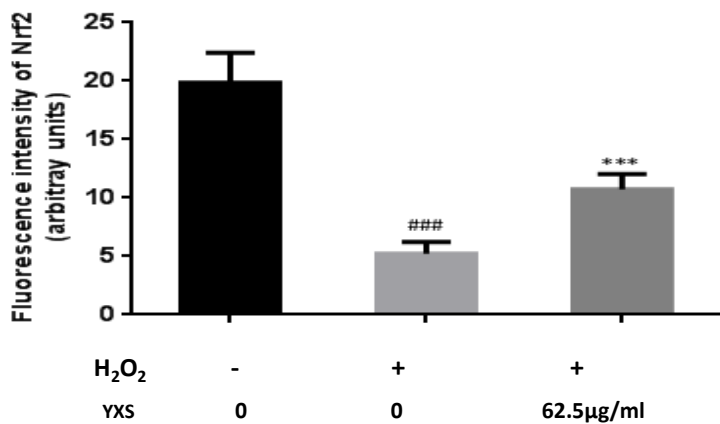

Supplement: f1 [file 8049079.f1.zip]
